1 **Neuronal activity–driven oligodendrogenesis in selected brain regions is required for episodic**  
2 **memories**

3

4 Luendreo P. Barboza<sup>1,2</sup>, Benjamin Bessières<sup>1</sup>, Omina Nazarzoda<sup>1,3,4</sup>, and Cristina M. Alberini<sup>1,5</sup>

5 <sup>1</sup> Center for Neural Science, New York University, New York

6 <sup>2</sup> Neuroscience and Physiology, Neuroscience Institute, New York University Langone Medical Center,

7 New York

8 <sup>3</sup> School of Medicine, University of Virginia, Virginia

9 <sup>4</sup> School of Natural and Behavioral Sciences, CUNY Brooklyn College, New York

10 <sup>5</sup> Correspondence to Cristina M. Alberini, Center for Neural Science, 4 Washington Place Room 824,  
11 New York University; New York, USA; [ca60@nyu.edu](mailto:ca60@nyu.edu)

12

13 Impact statement: Oligodendrogenesis is required in the anterior cingulate cortex but not in the  
14 hippocampus for long-term memory consolidation.

15

16 Keywords: episodic memory, oligodendrogenesis, hippocampus, anterior cingulate cortex, rat, mouse

17

18 **Abstract**

19 The formation of long-term episodic memories requires the activation of molecular mechanisms in  
20 several regions of the medial temporal lobe, including the hippocampus and anterior cingulate cortex  
21 (ACC). The extent to which these regions engage distinct mechanisms and cell types to support memory  
22 formation is not well understood. Recent studies reported that oligodendrogenesis is essential for learning  
23 and long-term memory; however, whether these mechanisms are required only in selected brain regions is  
24 still unclear. Also still unknown are the temporal kinetics of engagement of learning-induced  
25 oligodendrogenesis and whether this oligodendrogenesis occurs in response to neuronal activity. Here we  
26 show that in rats and mice, episodic learning rapidly increases the oligodendrogenesis and myelin  
27 biogenesis transcripts *olig2*, *myrf*, *mbp*, and *plp1*, as well as oligodendrogenesis, in the ACC but not in the  
28 dorsal hippocampus (dHC). Region-specific knockdown and knockout of *Myrf*, a master regulator of  
29 oligodendrocyte maturation, revealed that oligodendrogenesis is required for memory formation in the  
30 ACC but not the dHC. Chemogenetic neuronal silencing in the ACC showed that neuronal activity is  
31 critical for learning-induced oligodendrogenesis. Hence, an activity-dependent increase in  
32 oligodendrogenesis in selected brain regions, specifically in the ACC but not dHC, is critical for the  
33 formation of episodic memories.

## 34 **Introduction**

35 Long-term memories are initially fragile but become resilient to disruption through consolidation,  
36 a temporally graded process that engages cascades of molecular mechanisms in select brain regions.  
37 Episodic memories become consolidated by rapidly recruiting molecular changes in several brain regions,  
38 including the hippocampus, medial prefrontal cortex (mPFC), and anterior cingulate cortex (ACC)  
39 (Frankland & Bontempi, 2005; Kandel et al., 2014; Squire et al., 2015). Whereas the molecular changes  
40 recruited by the hippocampus are needed to continue for days, those recruited in the cortices are  
41 persistently required for weeks (Heyward & Sweatt, 2015; Chen et al., 2020), suggesting that there is  
42 differential engagement, and therefore distinct biological regulations in different regions underlying  
43 memory consolidation and storage. This agrees with the observation that regions of the brain differ in  
44 biological composition as a result of their unique cellular populations and regulate distinct molecular  
45 pathways in response to learning (Saunders et al., 2018; Chen et al., 2020; Katzman et al., 2021).

46 Although research in the field of learning and memory has thus far mostly focused on neuronal  
47 mechanisms and circuitry, in the last decade it has become clear that long-term memory formation  
48 requires the contribution of multiple cell types, including astrocytes (Gerlai et al., 1995; Suzuki et al.,  
49 2011; Adamsky & Goshen, 2018), microglia (Yirmiya & Goshen, 2011; Morris et al., 2013), and  
50 oligodendrocytes (McKenzie et al., 2014; Xin & Chan, 2020). Recent reports showed that  
51 oligodendrogenesis and *de novo* myelination play critical roles in the formation of several types of  
52 memory, including motor, spatial, and episodic (McKenzie et al., 2014; Pan et al., 2020; Steadman et al.,  
53 2020; Wang et al., 2020) as well as in sensory enrichment (Hughes et al., 2018). These studies examined  
54 the role of oligodendrocytes by assessing brain-wide oligodendrogenesis, however, several questions  
55 remain to be addressed. First, are distinct brain regions differentially engaging oligodendrocytes  
56 mechanisms in learning and memory? Second, what is the fine temporal engagement of learning-induced  
57 oligodendrogenesis? And, finally, does this oligodendrogenesis require neuronal activation?

58 Steadman et al. (2020) reported that the acquisition of spatial memory in mice is accompanied by  
59 an increase in oligodendrocyte precursor cells (OPCs) proliferation and/or differentiation mechanisms in

60 the ACC, mPFC, and corpus callosum/cingulum (CC/Cg), but not in the hippocampus, suggesting that  
61 these regions may differentially engage oligodendrogenesis in memory formation. Yet, whether this is the  
62 case remains to be tested. In addition, using brain-wide conditional genetic knockout of myelin regulatory  
63 factor (*Myrf*, a transcription factor required for oligodendrogenesis), the same authors provided evidence  
64 that oligodendrogenesis and *de novo* myelination are required for long-term memory formation and for  
65 learning-induced ripple-spindle coupling between the hippocampus and ACC, a cross-region  
66 synchronization believed to contribute to memory consolidation. Their temporal assessment for the  
67 critical role of oligodendrogenesis revealed that global *Myrf* knockout during learning or the initial phase  
68 of memory consolidation disrupts both recent (tested 1 day later) and remote spatial memories (tested 28  
69 days later) (Steadman et al., 2020), whereas *Myrf* knockout 25 days after training had no effect on  
70 memory, leading to the conclusion that spatial learning and/or consolidation, but not remote memory  
71 storage, requires oligodendrogenesis. Pan et al. (2020) obtained a different result using another  
72 hippocampus-dependent task in mice, contextual fear conditioning. They found that global knockout of  
73 *Myrf* prior to learning impairs remote memory (tested 30 days after training) but not recent memory  
74 (tested 1 day after training). Hence, while the effect of oligodendrogenesis on recent hippocampus-  
75 dependent memories is still under debate, both studies concluded that experience-dependent changes in  
76 myelination are required for long-term memory formation. Notably, the contribution of oligodendrocyte  
77 mechanisms during acquisition remains to be defined. Finally, while previous work showed that neuronal  
78 activity generally promotes oligodendrogenesis and adaptive myelination (Gibson et al., 2014; Baraban et  
79 al., 2016) whether the learning-induced oligodendrogenesis requires neuronal activity remains to be  
80 established.

81 To address these questions, we employed inhibitory avoidance (IA), an episodic memory  
82 paradigm, in rats and mice. We found that oligodendrogenesis in the ACC, but not dorsal hippocampus  
83 (dHc), is rapidly induced and required for memory consolidation, whereas it is dispensable for  
84 acquisition and storage of the memory. We also observed that learning-induced oligodendrogenesis in the  
85 ACC is dependent upon neuronal activity.



86

## 87 **Results**

### 88 **Episodic learning rapidly increases oligodendrocyte-specific mRNAs in the ACC but not dHC in** 89 **rats**

90 To assess whether episodic learning induces oligodendrocyte-specific changes in the dHC and  
91 ACC of rats, we employed IA, a learning paradigm that results in long-term memory formation after a  
92 single-context-footshock association (Gold, 1986). We performed a time-course analysis of transcripts  
93 typically expressed during oligodendrocyte differentiation and myelin biogenesis using reverse  
94 transcription–quantitative polymerase chain reaction (RT–qPCR) on samples collected one hour, one day,  
95 and seven days following training (Fig. 1A). We analyzed expression of *myrf*, oligodendrocyte  
96 transcription factor 2 (*olig2*), ectonucleotide pyrophosphatase 6 (*enpp6*), myelin basic protein (*mbp*),  
97 proteolipid protein 1 (*plp1*), and myelin associated glycoprotein (*mag*). *Olig2* is required for terminal  
98 differentiation of OPCs and indirectly induces the transcription of *myrf*, a master regulator of myelin  
99 biogenesis (Bujalka et al., 2013; Emery, 2013). MYRF protein binds to the promoter regions of myelin-  
100 associated genes and regulates the transcription of *mbp*, *plp1*, and *mag* (Bujalka et al., 2013). Together,  
101 the proteins MAG, PLP1, and MBP ensure proper myelin biogenesis, wrapping, compaction, and function  
102 (Sherman & Brophy, 2005; Simons & Nave, 2015). ENPP6 is a choline phosphodiesterase involved in  
103 lipid metabolism and myelin biogenesis (Morita et al., 2016).

104 We first confirmed that trained rats exhibited brain activation by assessing the expression of the  
105 immediate-early gene *arc* (Bramham et al., 2010; Shepherd & Bear, 2011; Okuno et al., 2012), and  
106 observed that expression was increased at one hour after training and had returned to baseline levels at  
107 one and seven days after training (Fig. 1B). We found that training led to a rapid and significant increase  
108 in the levels of *olig2*, *myrf*, *mbp*, and *plp1* mRNAs in the ACC (Fig. 1C) at 1 hour after training relative to  
109 untrained (UT) rats, which remained in the homecage and unpaired control (UP) rats that underwent  
110 context and shock exposure in an unassociated fashion. All mRNA transcripts returned to baseline levels  
111 at one day and seven days after training. Furthermore, no significant changes in oligodendrocyte-specific

112 transcripts were detected in the UP group relative to the UT control group, indicating that the mRNA  
113 changes observed in trained rats were due to associative learning and not to novel context or shock  
114 presentation.

115 Expression of *olig2*, *myrf*, *plp1*, *mag*, and *mbp* in the dHC over the same time course did not  
116 change (Fig. 1D), although a significant increase in *enpp6* was detected at 1 hour and persisted at 1 day  
117 and 7 days after training. Collectively these data led us to infer that a rapid increase of oligodendrocyte  
118 differentiation transcripts following IA learning takes place in the ACC but not dHC, suggesting that  
119 there is an ACC-specific activation of oligodendrogenesis and *de novo* myelination following learning.

120 To determine whether the changes in mRNA expression were reproduced at the protein level, we  
121 used western blots to analyze levels of OLIG2, MBP and MAG and also added the axonal membrane  
122 protein CASPR (Einheber et al., 1997). Learning led to a significant increase in OLIG2 and CASPR one  
123 day after learning, but no changes in MAG and MBP (Fig. 1 E–H). We observed no differences in the UP  
124 mice compared to the untrained mice, suggesting that the significant increase in OLIG2 was linked to  
125 associative learning. We then visualized and quantified the increase in OLIG2 protein in the ACC by  
126 performing immunohistochemical staining (Fig. 1I). Quantification of the fluorescence intensity of all  
127 OLIG2-positive nuclei in the ACC of trained and untrained mice showed that training significantly  
128 increased the amount of OLIG2 in nuclei, but not the number of OLIG2-positive cells normalized to the  
129 quantified area. Together, these data indicate that learning leads to rapid increase of oligodendrogenesis  
130 and *de novo* myelin synthesis in the ACC but not in the dHC.

131

### 132 **Training increases OPC proliferation and oligodendrogenesis in the ACC but not dHC of mice**

133 The induction of *myrf* and *OLIG2* in the ACC but not the dHC of rats following training (Fig. 1)  
134 suggests that there is a differential increase in oligodendrogenesis in the ACC. To test this hypothesis, we  
135 quantified the rate of dividing oligodendrocytes in the ACC and dHC of mice. We injected the thymidine  
136 analog 5-ethynyl-2'-deoxyuridine (EdU) into mice one hour before IA training to label dividing cells and  
137 euthanized the animals one day later, when our previous experiments had shown a significant training-

138 induced increase in OLIG2 protein levels (Fig. 1E, G). We measured the number of proliferating OPCs by  
139 counting cells co-stained with fluorescently labeled EdU and antibodies to platelet-derived growth factor  
140 receptor alpha (PDGFR $\alpha$ ), a marker of OPCs (Rivers et al., 2008). We quantified newly differentiated  
141 oligodendrocytes by visualizing cells labelled with EdU and positive for immunostaining with antibodies  
142 to OLIG2, a marker of oligodendrocytes at all stages of maturation as well as adenomatous polyposis coli  
143 clone CC-1 (CC1), a marker of mature oligodendrocytes (McKenzie et al., 2014).

144 OPC proliferation and oligodendrocyte differentiation significantly increased in the ACC after IA  
145 training (Fig. 2A); however, training did not appear to affect oligodendrocyte differentiation or  
146 proliferation in the dHC (Fig. 2B) nor in the hippocampal subregions DG, CA1, CA2, and CA3  
147 (supplementary data Fig. 1). We concluded that oligodendrogenesis is differentially upregulated in the  
148 ACC but not the dHC one day after episodic learning.

149

### 150 ***Myrf* knockout disrupts memory formation**

151 Next, we asked whether oligodendrogenesis is required for IA memory formation in mice. We  
152 employed a conditional knockout mouse model in which *myrf* is globally deleted in OPCs. Because  
153 MYRF is a transcription factor required for oligodendrocyte differentiation, its deletion in OPCs impairs  
154 oligodendrogenesis, and therefore new myelin formation, while leaving existing myelin  
155 unaffected (McKenzie et al., 2014). We tested the effect of *myrf* knockout in OPCs on long-term memory  
156 using a double transgenic mouse line carrying a tamoxifen (TAM)-inducible CreER<sup>T2</sup> expressed under the  
157 OPC-specific promoter *Pdgfra* and a floxed *myrf* gene (*Pdgfra*-CreER<sup>T2</sup>  $\times$  *Myrf*<sup>floxed/floxed</sup>; hereafter, P-  
158 *Myrf*<sup>floxed/floxed</sup>). Injections of TAM in the P-*Myrf*<sup>floxed/floxed</sup> mice lead to the deletion of *Myrf* from OPCs,  
159 thereby preventing their differentiation and thus impairing oligodendrogenesis and the production of new  
160 myelin globally (McKenzie et al., 2014). We used *Pdgfra*-CreER<sup>T2</sup>-*Myrf*<sup>+/+</sup> (P-*Myrf*<sup>+/+</sup>) wild-type  
161 littermates as controls.

162 To confirm the effect of *myrf* deletion in OPCs on oligodendrocyte differentiation in the brain,  
163 TAM-treated P-Myrf<sup>floxed/floxed</sup> and P-Myrf<sup>+/+</sup> mice received an injection of EdU one hour before IA  
164 training to label proliferating cells and were perfused one day later. Oligodendrogenesis was significantly  
165 inhibited in the ACC in P-Myrf<sup>floxed/floxed</sup> mice, as demonstrated by the significant reduction in the number  
166 of cells that were positive for EdU, OLIG2, and CC1 in P-Myrf<sup>floxed/floxed</sup> mice compared to P-Myrf<sup>+/+</sup>  
167 littermate controls (Fig. 3A).

168 To test the effect of *Myrf* knockout on memory formation, TAM was administered to  
169 Myrf<sup>floxed/floxed</sup> and P-Myrf<sup>+/+</sup> mice seven days before IA training, and the mice were tested at 1, 7, and 28  
170 days after training. P-Myrf<sup>floxed/floxed</sup> mice exhibited significant memory reduction at all time points  
171 compared to P-Myrf<sup>+/+</sup> controls (Fig. 3B). To exclude the potential effects of multiple testing, a second  
172 experiment was conducted in which P-Myrf<sup>floxed/floxed</sup> and P-Myrf<sup>+/+</sup> littermates were tested only at 28 days  
173 after training, and we again observed significant impairment in memory retention (Fig. 3C). We  
174 concluded that brain-wide oligodendrogenesis is required for long-term memory formation and that  
175 inhibiting oligodendrogenesis before training impairs memory retention at both recent and remote time  
176 points post-training.

177 To determine whether oligodendrogenesis contributes to the persistence or storage of memory,  
178 we administered TAM to P-Myrf<sup>floxed/floxed</sup> and P-Myrf<sup>+/+</sup> mice 14 days after training, when the  
179 consolidation process has significantly advanced (Bambah-Mukku et al., 2014; Squire et al., 2015).  
180 Memory retention was tested 14 days after knockout, corresponding to 28 days after training, as well as at  
181 36 days and 56 days after training. No difference was detected between groups (Fig. 3D), indicating that  
182 oligodendrogenesis is not required for the persistence, retrieval, or storage of long-term memory.

183 Finally, to determine whether mechanisms involving oligodendrogenesis play a role in the formation of  
184 non-aversive episodic memories, P-Myrf<sup>floxed/floxed</sup> and P-Myrf<sup>+/+</sup> littermates were injected with TAM  
185 seven days before being trained in novel object location (nOL), a hippocampus-dependent learning  
186 paradigm (Mumby et al., 2002; Weible et al., 2009; Pezze et al., 2016) P-Myrf<sup>floxed/floxed</sup> mice showed a

187 significant nOL memory impairment compared to P-Myrf<sup>+/+</sup> littermates (Fig. 3E) when tested four hours  
188 after training.

189 Thus, *Myrf*-dependent oligodendrogenesis is also required for the formation of non-aversive  
190 hippocampus-dependent memories.

191 To exclude that the memory impairments we observed were due to other behavioral responses  
192 such as heightened anxiety-like responses or locomotor impairments, we tested P-Myrf<sup>floxed/floxed</sup> and P-  
193 Myrf<sup>+/+</sup> littermates in open field behavior. Time spent in the center of an open field arena and the distance  
194 and velocity traveled in the arena are putative measures of anxiety and locomotion abilities, respectively.  
195 No significant differences in anxiety-like and locomotor responses were detected; the time spent in the  
196 center and the distance and mean velocity traveled were similar between P-Myrf<sup>floxed/floxed</sup> and P-Myrf<sup>+/+</sup>  
197 littermates (Fig. 3F). Collectively, these results indicate that oligodendrogenesis is required for the  
198 formation of long-term hippocampus-dependent memories.

199

### 200 ***Myrf* knockdown in the ACC but not the dHC of rats impairs memory consolidation but not** 201 **learning**

202 In order to investigate whether oligodendrogenesis is differentially implicated in distinct brain  
203 regions and memory processes, we employed a *Myrf* knockdown strategy. Because the P-Myrf<sup>floxed/floxed</sup>  
204 global knockout approach used previously affects other tissues and organs where *Myrf* is expressed in  
205 addition to the central nervous system, such as the gastrointestinal tract and kidney, employing a region-  
206 targeted approach also addresses possible off-target effects of Pdgfra-driven global *Myrf* deletion. We  
207 achieved region-specific and temporally restricted *Myrf* knockdown by using stereotactic injections to  
208 deliver an antisense oligodeoxynucleotide (ASO-ODN) specific against *Myrf* (Myrf-ASO), and, as a  
209 control, a related scrambled sequence (Myrf-SCR). We injected the ODNs bilaterally into the brain region  
210 of interest at various times before and after training.

211 The temporally limited effect of the ODN knockdown approach offers the opportunity to dissect  
212 the temporal dynamics of the requirement of specific mRNA translations, in addition to allowing the

213 definition of anatomical requirements (Taubenfeld et al., 2001; Garcia-Osta et al., 2006; Chen et al.,  
214 2011) Hence, we used the Myrf-ASO approach to examine whether learning-induced expression of *Myrf*  
215 is required in the ACC for memory acquisition or consolidation.

216 To verify knockdown of *myrf*, Myrf-ASO and Myrf-SCR were injected bilaterally 15 minutes  
217 before training, and *myrf* mRNA levels were measured in the ACC one hour after training, when there is a  
218 significant learning-dependent increase in *myrf* expression (Fig. 1C). Rats treated with Myrf-ASO had  
219 significantly lower *myrf* mRNA levels compared to those treated with Myrf-SCR (Fig. 4A). Rats injected  
220 with Myrf-ASO exhibited no significant differences in MBP protein expression in the ACC one day after  
221 training, suggesting that Myrf-ASO treatment does not lead to demyelination (Fig. 4B).

222 In order to test whether MYRF is required for learning, we bilaterally injected Myrf-ASO or  
223 Myrf-SCR into the ACC 15 minutes before training and tested the effect 1 hour after training. We  
224 detected no differences in memory between the two groups (Fig. 4C), indicating that MYRF is  
225 dispensable in the ACC for learning and short-term IA memory. To test whether MYRF is required for  
226 memory consolidation, bilateral injections of Myrf-ASO or Myrf-SCR were administered in the ACC 15  
227 minutes before and six hours after training, then memory was tested one day after training. Rats injected  
228 with Myrf-ASO exhibited significant memory impairment one day after training compared to rats that had  
229 received Myrf-SCR injections (Fig. 4D), and the impairment persisted at 28 days after training (Fig. 4D).  
230 A reminder shock given one day after the remote memory test was unable to reinstate memory, indicating  
231 that the memory impairment was not due to a suppressed memory response but likely resulted from  
232 disrupted memory consolidation. Furthermore, retraining one day later of rats who had been injected with  
233 Myrf-ASO resulted in a long-lasting memory, thereby excluding the possibility that they had experienced  
234 memory loss due to damage to the ACC caused by surgery or injections.

235 By contrast, when Myrf-ASO was injected bilaterally into the dHC 15 minutes before and six  
236 hours after IA training, we observed no effect on memory retention; memories of the two treatment  
237 groups were similar at one day and 28 days after training (Fig. 4E). The lower level of retention in the  
238 dHC relative to the ACC with stereotactic injections is typically observed. Thus, we concluded that *Myrf*-

239 dependent oligodendrogenesis in the ACC is critical for the consolidation but not the acquisition of IA  
240 and is not required in the dHC.

241

## 242 **Oligodendrogenesis in the mouse ACC is required for memory formation**

243 Studies published thus far on the role of oligodendrogenesis in memory formation have reported  
244 that brain-wide disruption of oligodendrogenesis impairs motor learning, spatial memory, and remote  
245 contextual fear memory in mice (McKenzie et al., 2014; Pan et al., 2020; Steadman et al., 2020). Our data  
246 in rats indicated that MYRF-induced oligodendrogenesis is essential for memory consolidation in the  
247 ACC but not the dHC. To investigate region-specific roles of oligodendrogenesis in memory formation in  
248 the mouse brain, we bilaterally injected an adeno-associated viral vector expressing CreER<sup>T2</sup> driven by  
249 the *Mbp* promoter (AAV-Mbp-CreER<sup>T2</sup>) in *Myrf*<sup>+/+</sup> and *Myrf*<sup>fllox/fllox</sup> mice to knock out *Myrf* selectively in  
250 either ACC or dHC under the regulation of TAM. After two weeks to allow for viral expression,  
251 intraperitoneal injections of TAM were administered four times, once every other day, then mice  
252 underwent IA training (Fig. 5A). Diffusion of Chicago blue dye indicated that material injected into the  
253 ACC remained mostly confined there (Fig. 5B). Compared to *Myrf*<sup>+/+</sup> littermates, *Myrf*<sup>fllox/fllox</sup> mice  
254 injected with AAV-Mbp-CreER<sup>T2</sup> showed a significant decrease in oligodendrogenesis in the ACC (Fig.  
255 5C) one day after training, confirming that the viral injection led to *Myrf* knockout.

256 To determine the role of oligodendrogenesis in the ACC on behavioral responses, *Myrf*<sup>+/+</sup> and  
257 *Myrf*<sup>fllox/fllox</sup> littermates were treated with the same viral and TAM injection protocol as above but tested  
258 for memory retention at one day and seven days after training. Compared to *Myrf*<sup>+/+</sup> littermates,  
259 *Myrf*<sup>fllox/fllox</sup> mice showed a significant memory impairment at both time points after training.

260 To test whether ACC-specific oligodendrogenesis is required for learning and short-term  
261 memory, another cohort of *Myrf*<sup>+/+</sup> mice and *Myrf*<sup>fllox/fllox</sup> littermates were treated with the same viral  
262 injection and TAM protocol but tested at one hour after IA training. No differences between groups were  
263 observed (Fig. 5D, E), leading us to conclude that oligodendrogenesis in the ACC is necessary for



264 memory consolidation but dispensable for memory acquisition and short-term memory in mice, just as in  
265 rats.

266 To test whether oligodendrogenesis is required for memory formation in the hippocampus, AAV-  
267 Mbp-CreER<sup>T2</sup> was bilaterally injected into the dHC of Myrf<sup>+/+</sup> and Myrf<sup>flox/flox</sup> littermates using the  
268 protocol described above. No differences in memory retention were observed at one day or seven days  
269 post-training compared to control groups (Fig. 5F), leading us to conclude that oligodendrogenesis is  
270 required in the ACC for memory consolidation but not for learning or short-term memory. By contrast,  
271 oligodendrogenesis is dispensable in the dHC for the formation of hippocampus-dependent memories.

272

### 273 **DREADD-mediated neuronal inhibition impairs learning-induced oligodendrogenesis**

274 Neuronal activity can drive oligodendrogenesis and adaptive myelination (Gibson et al., 2014)  
275 however, it was not known whether neuronal activity is required to induce learning-dependent  
276 oligodendrogenesis. To address this question, we employed the adeno-associated virus 8 (AAV8)  
277 expressing the Gi-coupled Designer Receptor Exclusively Activated by Designer Drugs (DREADD)  
278 hM4Di under the control of the human synapsin promoter to target expression to neurons (AAV-hSyn-  
279 hM4D(Gi)-mCherry). We injected AAV-hSyn-hM4D(Gi)-mCherry bilaterally in the ACC and after two  
280 weeks to allow for viral expression, we administered its DREADD ligand compound 21 (C21)  
281 intraperitoneally (IP) one hour before IA training to transiently silence neuronal activity in the ACC  
282 (Jendryka et al., 2019; Tran et al., 2020; Luo et al., 2021). In addition to hM4Di, the AAV-hSyn-  
283 hM4D(Gi)-mCherry viral construct expresses the fluorescent protein mCherry in neurons. Fluorescence  
284 was assessed by confocal microscopy two weeks after viral infection and found to be mostly confined to  
285 the ACC (Fig. 6A). The mice were tested one day after training. Treatment with C21 significantly  
286 impaired memory retention compared to vehicle injection (Fig. 6B), suggesting that neuronal activity in  
287 the ACC is required for memory formation.

288 To determine whether blocking neuronal activity in the ACC affected learning-dependent  
289 oligodendrogenesis, AAV-hSyn-hM4D(Gi)-mCherry was bilaterally injected into the ACC and fourteen



290 days later the mice were injected with either C21 or vehicle in combination with EdU two hours before  
291 receiving IA training. The mice were perfused one day after training and oligodendrogenesis was assessed  
292 by performing immunohistochemistry with an antibody to OLIG2 then quantifying cells that were  
293 positive for both EdU and OLIG2. Trained mice injected with C21 had significantly fewer cells with both  
294 EdU and OLIG2 staining compared to mice injected with vehicle control, implying that  
295 oligodendrogenesis was greatly impaired (Fig. 6C). Thus, we concluded that neuronal activity in the ACC  
296 is required for learning-induced oligodendrogenesis.

297

## 298 **Discussion**

299 This study showed that episodic learning, modeled by an IA paradigm in rats and mice, induces a  
300 rapid expression of the oligodendrocyte-specific mRNAs *olig2*, *myrf*, *mbp*, and *plp1* in the ACC but not  
301 in the dHC, though we did detect an increase in *enpp6* in the dHC. The reason for this increase in *enpp6* is  
302 unclear; ENPP6 is a choline phosphodiesterase involved in lipid metabolism and myelin biogenesis  
303 (Morita et al., 2016), and one possible explanation for its upregulation in the absence of changes in  
304 oligodendrogenesis markers is that ENPP6 in the hippocampus might be recruited by learning to regulate  
305 mechanisms of myelination and not oligodendrogenesis. In fact, whether existing myelin is remodeled  
306 after a learning experience is an open question.

307 Our western blot analyses confirmed that levels of OLIG2 significantly increased in the ACC  
308 following learning, supporting the idea that oligodendrogenesis is rapidly upregulated in this brain region  
309 in response to experience. Interestingly, MBP protein levels did not change, despite a significant increase  
310 in *mbp* mRNA levels. This dichotomy might be due to the fact that there is a large pool of MBP in the  
311 brain, so relatively small changes of MBP induced by a learning event may be difficult to be detected.  
312 Another oligodendrocyte-specific protein, CASPR, which is an axonal membrane protein involved in  
313 myelin sheet growth, significantly increased after learning in the ACC, confirming the idea that learning  
314 rapidly activates oligodendrocyte-specific mechanisms and myelination in that region. The upregulation  
315 of both mRNAs and proteins accompanied associative learning but were not found in unpaired behavioral

316 paradigms, which served as a control for the separate experiences of context and footshock, indicating  
317 that oligodendrocyte-mediated mechanisms are involved in associative memory processes.

318 Our results also extended previous findings on motor, spatial, and contextual fear memories by  
319 showing that global disruption of oligodendrogenesis impairs novel object location memories,  
320 strengthening the conclusion that oligodendrogenesis is a fundamental mechanism required for long-term  
321 memory formation.

322 Furthermore, by using multiple genetic and molecular approaches in rats and mice targeting  
323 specific brain regions of interest we provided evidence that *Myrf*-dependent oligodendrogenesis is  
324 required in the ACC but not the dHC, confirming the data across species. Thus, only certain brain regions  
325 in a given memory system recruit oligodendrogenesis for memory consolidation. To our knowledge, this  
326 is the first demonstration of a differential requirement for oligodendrogenesis in selected brain regions for  
327 memory formation, and specifically for hippocampus-dependent memories. Steadman et al. (2019) and  
328 Pan et al. (2020) recently reported that global *myrf* knockout prevents the formation of spatial and  
329 contextual memories. These studies showed that water maze and contextual fear conditioning learning in  
330 mice rapidly induce oligodendrocyte precursor cell (OPC) proliferation and differentiation into  
331 myelinating oligodendrocytes (OLs) in cortical regions such as the ACC and medial prefrontal cortex  
332 (mPFC), but not the hippocampus. They suggested that myelin remodeling following training might be  
333 restricted to brain regions associated with long-term consolidation of hippocampus-dependent memories.  
334 However, because these studies utilized a global knockout approach, they could not determine whether  
335 oligodendrogenesis in specific brain regions is required for memory formation. Identification of region-  
336 and circuitry-specific requirements for oligodendrogenesis and/or myelination in different types of  
337 learning and behavioral stimuli is important because it will offer critical knowledge for better  
338 understanding the role of myelin in healthy brain functions as well as in diseases. Such a knowledge will  
339 also expand our understanding of the circuitry that supports responses to learning.

340 Why oligodendrogenesis is required in the ACC but not the hippocampus is an open question, and  
341 one possible explanation is that oligodendrogenesis may subserve long-term changes required for memory

342 storage. It is known that in cortical regions including the ACC, but not in the hippocampus, episodic and  
343 spatial memories are stored for the very long term via a process that requires time and is known as system  
344 consolidation (Dudai et al., 2015). During system consolidation the memories that initially recruit  
345 hippocampus and cortical regions redistribute their representation: over time the hippocampus become  
346 dispensable, leaving cortical regions as the site of long-term memory storage (Frankland & Bontempi,  
347 2005; Dudai et al., 2015; Squire et al., 2015) . Notably, other types of memory such as motor memories  
348 are stored long-term through a consolidation process in cortical areas and precisely in motor cortices  
349 (Attwell et al., 2002; Krakauer & Shadmehr, 2006). Further studies are needed to identify the region- and  
350 circuitry-specific oligodendrogenesis and myelination underlying the processes of consolidation of the  
351 various memory systems. For hippocampus-dependent memories, it is likely that other cortical regions in  
352 addition to the ACC recruit oligodendrogenesis. For example, similarly to the ACC, the mPFC is  
353 involved in hippocampus-dependent long-term memory consolidation (Frankland & Bontempi, 2005) and  
354 the induction of oligodendrogenesis has been found in the mPFC after spatial and contextual fear learning  
355 (Pan et al., 2020; Steadman et al., 2020). Whether there are differences in the regulation of  
356 oligodendrogenesis between the ACC and the mPFC remains to be investigated. Thus, in the context of  
357 this literature, our results lead us to speculate that myelination, which is a process that takes time and  
358 presumably leads to the stabilization of circuitry (Forbes & Gallo, 2017; Mount & Monje, 2017; Xin &  
359 Chan, 2020) may be a mechanism supporting the long-lasting memory storage, which in cortical regions  
360 persists for weeks, months, or even years. Whether the hippocampus is instructive for the cortical  
361 oligodendrogenesis changes induced by learning is possible and is in agreement with the findings that  
362 global oligodendrogenesis knockout impairs activity coupling between hippocampus and ACC. Indeed,  
363 Steadman (2019) and Pan (2020) both speculated that experience-dependent myelination might promote  
364 the coupling of ensembles across regions to support the generation of a coordinated memory network  
365 because when they blocked myelin formation throughout the brain, the activity and coordination in neural  
366 ensembles across the hippocampus and PFC networks was altered.

367           In the present study, we also dissected the requirement for oligodendrogenesis in various phases  
368 of memory. We found that oligodendrogenesis in the ACC is necessary for the consolidation process but  
369 not for the initial acquisition of memory (learning) or remote storage. In fact, inhibiting  
370 oligodendrogenesis before training did not affect short-term memory or acquisition, nor was there an  
371 effect on memory when oligodendrogenesis was inhibited at a remote time point. However, disruption of  
372 oligodendrogenesis after training impaired long-term memory tested one day later, and the impairment  
373 persisted when the memory was tested at remote time points, such as four weeks after training. The lack  
374 of an effect on memory when oligodendrogenesis is disrupted weeks after training agree with the results  
375 of Steadman et al. (2019), who showed that global knockout of *Myrf* at 25 days after water maze training  
376 did not impair memory retention. From these results, we can conclude that *MYRF*-dependent  
377 oligodendrogenesis in cortical regions is necessary for the rapid phase of consolidation, but not for  
378 learning, retrieval, or memory storage.

379           Our results also shed light on the kinetics of oligodendrogenesis requirement in recent memory  
380 recall. Steadman et al. (2019) found that *myrf* global knockout disrupts one-day-old spatial memory, and  
381 the disruption was still observed at a remote time point 28 days after training. By contrast, Pan et al.  
382 (2020) reported that *myrf* knockout mice trained in contextual fear conditioning (CFC) had intact recent  
383 memory recall at 1 day after training but impaired remote memories at 28 days after training. We found  
384 that global and ACC-targeted knockout of *myrf* in mice as well as ACC-specific ODN-mediated  
385 knockdown of MYRF in rats impaired recent memories, tested at one day after IA training. The  
386 impairments persisted in both rats and mice tested up to 28 days after training, leading us to conclude that  
387 MYRF-dependent oligodendrogenesis is rapidly upregulated and engaged following learning to  
388 selectively support a rapid phase of memory consolidation. It is possible that task-related differences in  
389 the kinetics of MYRF requirements exist, and that CFC has a slower cortical recruitment of  
390 oligodendrogenesis relative to water maze and IA tasks. Knowing the role of oligodendrogenesis in  
391 specific memory processes and temporal phases of memory provides valuable information for future  
392 development of temporally targeted treatments for cognitive symptoms of demyelinating diseases.

393           Finally, using a chemogenetic approach, we showed that the inhibition of neuronal activity in the  
394 ACC prevents learning-induced oligodendrogenesis. This demonstrated that oligodendrogenesis is  
395 triggered by neuronal activity and is in agreement with findings indicating that neuronal activity can drive  
396 adaptive myelination (Baraban et al., 2016; Mount & Monje, 2017; Noori et al., 2020). We speculate that  
397 neurons that are activated during learning engage oligodendrogenesis to produce *de novo* myelination that  
398 support formation and storage of the memory long term. Perhaps the activity-driven oligodendrogenesis  
399 reflect the activity-dependent changes in myelin patterning that have been hypothesized to promote  
400 coordinated reactivation of neural ensembles regulated by hippocampal-cortical synchronization and  
401 believed to underlie the consolidation of hippocampus-dependent memories (Pajevic et al., 2014).

402           In sum, our data support the view that activity-regulated oligodendrogenesis in selected brain  
403 regions underlies hippocampus-dependent memory consolidation. We suggest that this induced  
404 oligodendrogenesis provides the myelination necessary to support the stabilization process required to  
405 store information long-term.

406

407 **Materials and Methods**

408 **Key resources table:**

| Reagent type (species) or resource                       | Designation                                    | Source or reference    | Identifiers                       | Concentration |
|----------------------------------------------------------|------------------------------------------------|------------------------|-----------------------------------|---------------|
| Strain, strain background (R. norvegicus, male)          | CrI:LE Long-Evans                              | Charles River          | Cat# 2308852,<br>RRID:RGD_2308852 |               |
| Strain, strain background (M. Musculus, male and female) | B6, B6J, B6/J                                  | The Jackson Laboratory | Stock No: 000664                  |               |
| Strain, strain background (M. Musculus, male and female) | B6.129S-Pdgfra <sup>tm1.1(cre/ERT2)Blh/J</sup> | The Jackson Laboratory | Stock No: 032770                  |               |
| Strain, strain background (M. Musculus, male and female) | B6;129-Myrf <sup>tm1Barr/J</sup>               | The Jackson Laboratory | Stock No: 010607                  |               |
| Commercial assay or kit                                  | Qiagen RNeasy Micro Kit                        | Qiagen                 | Cat# 74004                        |               |
| Commercial assay or kit                                  | Qiagen QuantiTect Rev. Transcription Kit       | Qiagen                 | Cat# 205311                       |               |
| Commercial assay or kit                                  | Bio-Rad iQ SYBR Green Supermix                 | Bio-Rad                | Cat# 1708880                      |               |
| Commercial assay or kit                                  | Bradford protein assay kit                     | Bio-Rad                | Cat# 5000201                      |               |

|                            |                                                              |                                |                  |                            |
|----------------------------|--------------------------------------------------------------|--------------------------------|------------------|----------------------------|
| antibody                   | Anti-Olig2                                                   | Millipore<br>company           | Cat# MABN50      | WB: 1:1000;<br>IHC: 1:1000 |
| antibody                   | Anti-MBP                                                     | Millipore<br>company           | Cat# SKB3-05-675 | WB: 1:500;<br>IHC: 1:1000  |
| antibody                   | Anti-Caspr                                                   | Millipore<br>company           | Cat# MABN69      | WB: 1:2000                 |
| antibody                   | Anti-MAG                                                     | Cell<br>Signaling              | Cat# 9043S       | WB: 1:1000                 |
| antibody                   | anti-Olig2                                                   | Millipore<br>company           | Cat# AB9610      | IHC: 1:1000                |
| antibody                   | anti-CC1                                                     | Calbioche<br>m                 | Cat# OP80        | IHC 1:500                  |
| antibody                   | anti-Pdgfra                                                  | Cell<br>signaling              | Cat# 3461S       | IHC: 1:1000                |
| Commercial assay or kit    | Click-iT™ Plus EdU<br>Cell Proliferation Kit                 | Thermo<br>Fisher<br>Scientific | Cat# C20086      |                            |
| Chemical compound,<br>drug | 5-ethynyl-2'-<br>deoxyuridine                                | Biosynth                       | Cat# 087011802   | 80mg/kg                    |
| Chemical compound,<br>drug | DAPI (4',6-Diamidino-<br>2-Phenylindole,<br>Dihydrochloride) | Life<br>technologi<br>es       | Cat# CD1306      | 1:10,000                   |
| antibody                   | Alexa Fluor® 647 Goat<br>Anti-Mouse IgG (H+L)                | Invitrogen                     | Cat# A21236      | IF: 1:800                  |
| antibody                   | Alexa Fluor® 488 Goat<br>anti-Rabbit IgG (H+L)               | Invitrogen                     | Cat# A11034      | IF: 1:800                  |
| antibody                   | Alexa Fluor & reg; 568                                       | Invitrogen                     | Cat# A11036      | IF: 1:800                  |

|                            |                                   |                                |                                                                                                                                             |                                            |
|----------------------------|-----------------------------------|--------------------------------|---------------------------------------------------------------------------------------------------------------------------------------------|--------------------------------------------|
|                            | goat anti-rabbit IgG<br>(H+L)     |                                |                                                                                                                                             |                                            |
| Genetic reagent            | pAAV-MBP-CreER <sup>T2</sup>      | Biolabs                        | Cat# VB1545                                                                                                                                 | AAV-PHP.B<br>capsid; titer:<br>10x13 GC/μl |
| Genetic reagent            | AAV-hSyn-hM4D(Gi)-<br>mCherry     | Addgene                        | Cat# 50475-AAV8                                                                                                                             | titer: 7×10 <sup>12</sup><br>vg/mL;        |
| Chemical compound,<br>drug | compound 21                       | Hello Bio                      | Cat#: HB6124                                                                                                                                | 1mg/kg                                     |
| Chemical compound,<br>drug | Tamoxifen                         | Sigma-<br>Aldrich              | Cat# T5648                                                                                                                                  | 200mg/kg                                   |
| Antibody                   | IRDye 680LT                       | LI-COR<br>Biosciences          | Cat# 926-68050,<br>RRID:AB_2783642                                                                                                          | WB (1:10000)                               |
| Antibody                   | IRDye 800CW (goat<br>anti-rabbit) | LI-COR<br>Biosciences          | Cat# 926-32211,<br>RRID:AB_621843                                                                                                           | WB (1:10000)                               |
| Antibody                   | anti-β-actin                      | Santa<br>Cruz<br>Biotechnology | <u>Cat# sc-47778 HRP,</u><br><u>RRID:AB_2714189</u>                                                                                         | WB (1:20000)                               |
| Software, algorithm        | Adobe Illustrator C6              | Adobe                          | <a href="https://www.adobe.com/products/illustrator.html">https://www.adobe.com/products/illustrator.html</a>                               |                                            |
| Software, algorithm        | R                                 |                                | <a href="http://cran.r-project.org/">http://cran.r-project.org/</a>                                                                         |                                            |
| Software, algorithm        | Image Studio Lite                 | LI-COR<br>Biosciences          | <a href="https://www.licor.com/bio/products/software/image_studio_lite/">https://www.licor.com/bio/products/software/image_studio_lite/</a> |                                            |



410 **Rats**

411 All animal procedures complied with the US National Institute of Health Guide for the Care and  
412 Use of Laboratory Animals and were approved by the New York University Animal Care Committees.  
413 Adult male Long–Evans (Charles Rivers, Wilmington, MA) rats weighing between 200 and 250 g were  
414 used. Animals were individually housed and maintained on a 12-h light/dark cycle. Experiments were  
415 performed during the light cycle. All rats were pair-housed and allowed ad libitum access to food and  
416 water and were handled for 3 minutes per day for 5 days before behavioral procedures. For all  
417 experiments, rats were randomly assigned to different groups. All protocols complied with the National  
418 Institutes of Health Guidelines for the Care and Use of Laboratory Animals and were approved by the  
419 Institutional Animal Care and Use Committee at New York University.

420

421 **Mice**

422 Male and female *Pdgfra*-CreER<sup>T2</sup>-*Myrf* floxed (P-*Myrf*) mice were obtained by crossing *Pdgfra*-  
423 CreER<sup>T2</sup> (The Jackson Laboratory, Bar Harbor, ME; B6.129S-*Pdgfra*<sup>tm1.1(cre/ERT2)Blh</sup>/J; Stock No: 032770),  
424 and *Myrf* floxed mice (The Jackson Laboratory, Bar Harbor, ME; B6;129-*Myrf*<sup>tm1Barr</sup>/J; Stock No:  
425 010607). Breeding was designed to produce P-*Myrf*<sup>c+/+</sup>, P-*Myrf*<sup>flox/+</sup> P-*Myrf*<sup>flox/flox</sup>, *Myrf*<sup>c+/+</sup>, *Myrf*<sup>flox/+</sup>  
426 *Myrf*<sup>flox/flox</sup> male and female littermates. Mice were bred in the animal facilities at New York University  
427 under a 12 h/12 h light/dark cycle (light on at 07.00 a.m.) with food and water ad libitum. After weaning,  
428 mice were group-housed (two to four per cage) in transparent plastic cages (31 × 17 × 14 cm) with free  
429 access to food and water. For inducing Cre-mediated knockout, all P-*Myrf* groups were administered 4  
430 intraperitoneal (i.p.) injections of tamoxifen (TAM, Sigma-Aldrich St Louis, MO; Cat# T5648) dissolved  
431 in corn oil every other day at a dosage of 0.2g/kg of mouse. Mice were handled for 3 min per day for 5  
432 days before behavioral procedures. For oligodendrogenesis experiments, c57/BL6 8–10-week males were  
433 used.

434 All mice were 8-10 weeks old at the start of behavioral assays. For all experiments, mice were  
435 randomly assigned to different groups. All protocols complied with the National Institutes of Health

436 Guide for the Care and Use of Laboratory Animals and were approved by the Institutional Animal Care  
437 and Use Committee at New York University.

438

### 439 **Inhibitory Avoidance**

440 The paradigm employed a chamber (Med Associates Inc., St. Albans, VT), which consisted of a  
441 rectangular Perspex box divided into a white light illuminated compartment and a dark black shock  
442 compartment (each 20.3 cm × 15.9 cm × 21.3 cm) separated by a door. The chamber was located in a  
443 sound-attenuated, red light illuminated room. During training and re-training sessions, the animal was  
444 placed in the lit compartment with its head facing away from the door. After 10 seconds (s) for rats and  
445 30s for mice, the door automatically opened, allowing the animal access to the dark compartment. The  
446 door closed when the animal entered the dark compartment with all four limbs, and a foot shock (2 s,  
447 0.9 mA in rats and 0.7mA in mice) was administered. The animal was removed from the dark  
448 compartment (10 s after the shock for rats and immediately after for mice) and returned to its home cage.  
449 Memory tests were performed at designated time points by placing the animal back in the lit compartment  
450 and measuring their latency to enter the dark compartment. Foot shocks were not administered during  
451 memory testing, and testing was terminated at 900s. Reminder foot shocks (R.S.), with identical duration  
452 and intensity to those used in training (i.e., 2 s, 0.9 mA), were administered in a novel, neutral chamber  
453 with transparent walls in a different experimental room. The animal was placed into the neutral chamber  
454 for 10s before receiving a single R.S. The animal was removed from the chamber immediately after the  
455 R.S. and returned to its home cage.

456 Control groups consisted of 1) untrained (U.T.) animals which were handled like the  
457 experimental but, instead of undergoing training, remained in their home cage, and 2) unpaired (UP)  
458 animals, which underwent the I.A. box exposure procedure without receiving a shock and, one hour later,  
459 given a foot shock immediately after being placed on the grid of the dark chamber and then immediately  
460 returned to the home cage.

461

## 462 **Real-time quantitative PCR (RT-qPCR)**

463 The bilateral dorsal hippocampus or ACC was dissected into TRIzol (Invitrogen, Waltham, MA).  
464 Total RNA was extracted from each animal sample using RNeasy Micro Kit (Qiagen, New Delhi, India,  
465 cat# 74004) and reverse-transcribed using Qiagen QuantiTect Rev. Transcription Kit (Cat# 205311). RT-  
466 PCR was done using a BioRad CFX96 Touch Real-Time PCR machine. Twenty ng of the first-strand  
467 cDNA was subjected to PCR amplification using Bio-Rad iQ SYBR Green Supermix (Bio-Rad  
468 Laboratories, Hercules, CA; Cat# 1708880). Forty cycles of PCR amplification were performed:  
469 denaturing at check cycle 95°C for 15 s, annealing at 60°C for 30 s, and extension for 20 s at 72°C.  
470 Triplicates were performed for each cDNA sample. Delta-delta CT method was used to determine the  
471 relative quantification of gene expression in trained and unpaired groups compared to untrained animals.  
472 Primer sequences used: Mbp (Forward, 5' GGCAAGGACTCACACAAGAA 3'; Reverse, 5'  
473 CTTGGGTCCTCTGCGACTTC 3'), Plp1 (Forward, 5' GCCAGAATGTATGGTGTTTC 3'; Reverse, 5'  
474 CAGCAATCATGAAGGTGAG 3'), Myrf (Forward, 5' CCACATCAGCAGAACAAGTG 3'; Reverse, 5'  
475 ACACGATAGGTGAGCATAGG 3'), Mag (Forward, 5' CTGTGGTCGCCTTTG 3'; Reverse, 5'  
476 GCTCTCAGTGACAATCC 3'), Olig2 (Forward, 5' CACGTCTTCCACCAAGAAAG 3'; Reverse, 5'  
477 GTCCATGGCGATGTTGAG 3'), Enpp6 (Forward, 5' TGTGAGGTCCACCAGATG 3'; Reverse, 5'  
478 CCCGATGTCGAATGACTTG 3'), Erbb3 (Forward, 5' CTGGCGTCTTTGGAAGT 3'; Reverse, 5'  
479 GCAGACTGGAATCTTGATGG 3'), Arc (Forward, 5' CCCTGCAGCCCAAGTTCAAG 3'; Reverse, 5'  
480 GAAGGCTCAGCTGCCTGCTC 3'). Erg1 (Forward, 5' ACCTACCAGTCCCAACTCATC 3'; Reverse,  
481 5' GACTCAACAGGGCAAGCATAAC 3'). Cfos (Forward, 5' ATCCTTGGAGCCAGTCAAGA 3';  
482 Reverse, 5' ATGATGCCGGAACAAGAAG 3') and Gapdh (Forward,  
483 5'GAACATCATCCCTGCATCCA 3'; Reverse 5'CCAGTGAGCTTCCCGTTCA 3') was used as an  
484 internal control.

485

## 486 **Western Blot Analysis**

487 Rats were euthanized, and their brains were quickly removed and snap-frozen with pre-chilled  
488 2-methyl butane on dry ice. Dorsal hippocampal and ACC punches were obtained with a neuro punch (19  
489 gauge; Fine Science Tools, Foster City, CA) from frozen brains mounted on a cryostat at -20°C and  
490 isolated the bilateral regions per animal (individual animal sample). Individual animal samples were  
491 homogenized in ice-cold RIPA buffer (50 mM Tris base, 150 mM NaCl, 0.1% SDS, 0.5% Na-  
492 deoxycholate, 1% NP-40) with protease and phosphatase inhibitors (0.5 mM PMSF, 2 mM DTT, 1 mM  
493 EGTA, 2 mM NaF, 1 μM microcystin, 1 mM benzamidine, 1 mM sodium orthovanadate, and Sigma-  
494 Aldrich protease and phosphatase inhibitor cocktails). Protein concentrations were determined using the  
495 Bio-Rad protein assay (Bio-Rad Laboratories, Hercules, CA, USA). Equal amounts of total protein  
496 extract per sample (20 μg) were resolved on denaturing SDS-PAGE gels and transferred to the  
497 Immobilon-FL Transfer membrane (Bio-Rad Laboratories, Hercules, CA, USA) by electroblotting.  
498 Membranes were dried, reactivated in methanol, washed with water, and then blocked in the Biorad  
499 blocking buffer for 2 h at room temperature. The membranes were then incubated with primary antibody  
500 overnight at 4°C in the buffer recommended by the antibody manufacturer. The membranes were then  
501 washed with TBS containing 0.2% Tween-20 (TBST) and incubated with species-appropriate  
502 fluorescently conjugated secondary antibody goat anti-mouse IRDye 680LT (1:10,000) or goat anti-rabbit  
503 IR Dye 800CW (1:10,000) from LI-COR Bioscience (Lincoln, NE, USA)] for 2 h at room temperature.  
504 Membranes were again washed in TBST and finally scanned to detect immunoreactivities using the  
505 Odyssey Infrared Imaging System (Li-Cor Bioscience). Data were quantified using pixel intensities with  
506 the Odyssey software (Li-Cor) according to the manufacturer's protocols. The following antibodies were  
507 used at the indicated dilutions: Anti-Olig2 (1:1000, MilliporeSigma, Burlington, MA; cat# MABN50),  
508 Anti-MBP (1:500, MilliporeSigma, Burlington, MA; cat# SKB3-05-675), Anti-Caspr (1:2,000,  
509 MilliporeSigma, Burlington, MA; cat# MABN69), and Anti-MAG (1:1,000, Cell signaling, Danvers MA;  
510 cat# 9043S). Anti-β-Actin (1:20,000, Santa Cruz Biotechnology, Dallas, TX, USA; cat# sc-47778) was  
511 used as a loading control for all blots.

512

### 513 **Immunofluorescent staining**

514 Mice were anesthetized with an intraperitoneal (i.p.) injection of 750 mg/kg chloral hydrate and  
515 transcardially perfused with 4% paraformaldehyde in PBS pH 7.4. Their brains were post-fixed in PBS  
516 pH 7.4 overnight at 4°C, followed by PBS pH 7.4 with 30% sucrose for 72 h. 20 µm coronal brain  
517 sections were collected by cryosection for free-floating immunofluorescent staining. The sections were  
518 then incubated with the blocking solution (PBS pH 7.4 with 0.4% Triton X-100, 5% normal goat serum,  
519 1% bovine serum albumin) for 2 h at room temperature, followed by incubation with the primary  
520 antibody. Primary antibodies: rabbit anti-Olig2 antibody (1:1000, EMD MilliporeSigma, Burlington, MA;  
521 Cat# AB9610), mouse anti-Olig2 antibody (1:1000, EMD MilliporeSigma, Cat# MABN50), mouse anti-  
522 CC1 antibody (1:500, Calbiochem, cat# OP80), mouse anti MBP Antibody (1:1000, EMD  
523 MilliporeSigma , Cat# 06-675) or anti-Pdgfra antibody (1:1000, Cell signaling, Danvers MA, cat#  
524 3461S). Sections were incubated with primary antibodies diluted in the blocking solution for 48 h at 4°C.  
525 Subsequently, the brain sections were washed in PBS 0.4% Triton three times and then incubated with  
526 goat anti-rabbit or goat anti-mouse Alexa Fluor-568, Alexa Fluor-488, or Alexa Fluor-647 secondary  
527 antibodies (1:800, Invitrogen, Waltham, MA) for 2 h at room temperature. 5-ethynyl-2'-deoxyuridine  
528 (EdU) was incubated using Click-iT™ Plus EdU Cell Proliferation Kit (Thermo Fisher Scientific) after  
529 DAPI staining. Sections were mounted with Prolong Diamond antifade mountant (Invitrogen, Waltham,  
530 MA). Three sections, representing rostral, medial, and caudal ACC (+.98mm, +.5mm, and -.10mm  
531 bregma), and hippocampus (-1.3mm, -1.8mm, and -2.5mm bregma) were analyzed for each set of  
532 staining. One image per hemisphere per bregma section for each animal was captured by a Leica TCS  
533 SP5 confocal microscope (Leica, Wetzlar, Germany) at 20x. Quantification was performed using the  
534 ImageJ software (U.S. National Institutes of Health) blinded to the experimental conditions using  
535 automated custom macro programs. For 5-ethynyl-2'-deoxyuridine (EdU) quantification, mice were  
536 injected intraperitoneally with EdU (80mg/kg) dissolved in 7.4 PH phosphate-buffered saline. To stain for  
537 EdU we used Click-iT™ Plus EdU Cell Proliferation Kit (Thermo Fisher Scientific) after DAPI staining  
538 on brain sections.

539

#### 540 **Rat cannula implants and injections**

541 Rats were anesthetized with ketamine (75 mg/kg) mixed with xylazine (10 mg/kg), and stainless-  
542 steel guide cannulas (C313G-SPC; 26-gauge P1 Technologies, Roanoke, VA) were implanted bilaterally  
543 using a stereotaxic apparatus (Kopf Instruments, Tujunga, CA) through holes drilled in the overlying  
544 skull to target the ACC (0.2 mm anterior, 0.5 mm lateral, -1.3 mm ventral from bregma). The  
545 guide cannulas were fixed to the skull with dental cement. Rats were administered meloxicam (3 mg/kg,  
546 subcutaneous) and let recover for at least 14 days before undergoing behavioral experiments. The  
547 injections were conducted using a 33-gauge needle, extending 1.5 mm beyond the tip of the  
548 guide cannulas, and connected via a polyethylene tubing (PE50) to a 1  $\mu$ l Hamilton (Reno, NV) syringe  
549 controlled by an infusion pump (Harvard Apparatus, Holliston, MA) 2 nmol of antisense  
550 oligodeoxynucleotides (AS-ODN) or the relative scrambled sequence (SCR-ODN) were delivered per  
551 brain hemisphere in 0.5  $\mu$ l of PBS (pH 7.4) at a rate of 0.333  $\mu$ l/min. Sequences were as follows: Myrf AS  
552 5'-GGTCTCGTCCACCACCTCCAT-3'; Myrf SCR 5'-CCATCTTCCGACGTTTCGACCC-3'. The SCR-  
553 ODN, which served as control, contained the same relative AS-ODN base composition but in random  
554 order and showed no homology to any mammalian sequence in the GenBank database, as confirmed  
555 using a basic local alignment search tool (BLAST). All ODNs were phosphorothioated on the three-  
556 terminal bases at each end to protect against nuclease degradation. ODNs were synthesized, reverse-phase  
557 cartridges purified, and purchased from Gene Link (Hawthorne, NY). Rats were euthanized at the end of  
558 the behavioral experiments to confirm cannula and injection placement. Toward this end, 40  $\mu$ m coronal  
559 sections were sliced following fixation of the brains in 10% formalin; then, the sections were examined  
560 under a light microscope to verify cannula placement. Rats with incorrect placement were excluded from  
561 the study.

562

#### 563 **Object location memory**

564 Mice were habituated, trained, and tested in a square, open field ( $29 \times 29 \times 18$  cm) with white  
565 Plexiglas walls and floor measured at 12.5 ( $\pm 2.5$ ) lux in the center of a dim room. Visual cues were  
566 provided within the box and on the walls of the room. Behavior was recorded with a video camera  
567 positioned above the arena. Mice were first habituated to the arena for 10 minutes for 3 consecutive days  
568 before the training. Twenty-four hours after the last habituation session, each animal was returned to the  
569 arena for its training session. Training consisted of exposing the mice to two identical objects constructed  
570 from Mega Bloks (Montreal, Canada) secured to the floor of the arena. Object sizes were no taller than  
571 twice the size of the mice. Mice were initially placed facing a corner, away from the objects, and were  
572 allowed to explore the arena and objects for 10 min. 4 hours after training; each animal was tested in the  
573 arena. During testing, one object remained in the same location as during training, whereas the second  
574 object had been moved to a novel location. Animals were placed in the arena facing the same direction as  
575 during training and were allowed to explore for 10 min. The placement of the object in the novel location  
576 was counterbalanced between subjects. The arena and objects were cleaned between sessions. Video files  
577 were coded and scrambled. The experimenter was blind to treatment and scored the total time the mice  
578 spent actively exploring each object in each session. Active exploration was defined as the mice pawing  
579 at, sniffing, or whisking with their snout directed at the object from a distance of less than  $\sim 1$  cm. Sitting  
580 on or next to an object was not counted as active exploration. Mice with less than 10s total exploration  
581 time were excluded. If mice explored more than 15s, the exploration percentage was taken at 15s of total  
582 exploration time. Memory was measured as the percentage of time spent exploring the object in the novel  
583 location compared with the stationary object.

584

### 585 **Open field**

586 Mice were allowed to freely explore an open-field arena illuminated at 195 lux. ( $43.2$  cm  $\times$   $43.2$   
587 cm  $\times$   $30.5$  cm (Med Associates Inc., St. Albans, VTENV-515) for 10 min. The open field was designated  
588 into 2 sections: center box and outer border. Percentage time spent in the center and average velocity and

589 total distance were quantified. Activity was analyzed with Ethovision-XT (Noldus Information  
590 Technology).

591

## 592 **Mouse viral injections and C21 administration**

593 Mice were anesthetized with isoflurane. The skull was exposed, and holes were drilled in the  
594 skull bilaterally above the ACC or dHC. A Hamilton (Reno, NV) syringe with a 33 gauge needle,  
595 mounted onto a nanopump (K.D. Scientific, Holliston, MA), 0.2ul microliters of the virus was injected  
596 per mouse bilaterally into the ACC (+ 0.5mm anterior to bregma,  $\pm$  0.3 lateral of bregma, -2 dorsal of  
597 skull surface) or 1ul per mouse bilaterally into the dorsal hippocampus (+1.7mm anterior to bregma  $\pm$ 1.5  
598 lateral of bregma -1.75 dorsal of skull surface) at a rate of 0.2 $\mu$ L/min. The injection needle was left in  
599 place for 5 min following injection to allow complete dispersion of the solution and then the scalp was  
600 sutured. Meloxicam (3 mg/kg) was used as an analgesic treatment after surgeries, and mice were allowed  
601 to recover for 14 days before training.

602 The pAAV-MBP-CreER<sup>T2</sup> virus (titer: 10x13 GC/ $\mu$ l) was packaged into AAV-PHP.B capsid and  
603 purchased from Vector Biolabs (Malvern, PA, cat# VB1545). The AAV-hSyn-hM4D(Gi)-mCherry (cat#  
604 VB1545) was purchased from add gene (titer: 7 $\times$ 10<sup>12</sup> vg/mL; cat# 50475-AAV8). C21 (HB6124, Hello  
605 Bio, Princeton, NJ) was dissolved in PBS pH7.4 and injected at 1mg/kg 60 min before training. After  
606 behavioral experiments, mice were anesthetized with an i.p. injection of 750 mg/kg chloral hydrate and  
607 transcardially perfused with 4% paraformaldehyde in PBS pH 7.4. Their brains were post-fixed in this  
608 solution overnight at 4°C, followed by PBS pH7.4 with 30% sucrose for 72 h. 30  $\mu$ m brain sections were  
609 collected by cryosection for free-floating immunofluorescent staining.

610

## 611 **Statistical analyses**

612 Data were statistically analyzed using Prism software. The student's t-test was used to compare  
613 statistical differences between two experimental groups. When more than two groups were compared,  
614 data were analyzed with one- or two-way repeated-measure ANOVA followed by Bonferroni post hoc



615 test. All values represent the mean  $\pm$  standard error of the mean (SEM). The experimental n, the statistical  
616 test used, and the statistical significance are indicated in figure legends. The Excel-based PCR Array Data  
617 Analysis was used to analyze the qPCR results. The number of independent experiments carried out and  
618 the numbers of biological replicates [i.e., animals (n)] are indicated in each figure legend. No statistical  
619 method was used to predetermine sample size. The numbers of subjects used in our experiments were the  
620 minimum required to obtain statistical significance, based on our experience with the behavioral paradigm  
621 and in agreement with standard literature.

622

### 623 **Acknowledgments**

624 We thank Dr. James Salzer (New York University School of Medicine) for providing an initial group on  
625 transgenic mice and for helpful discussions. This work was supported by NIH grants R37MH065635 to  
626 CMA, HHMI Gilliam fellowship to LPB. ON was supported by NIGMS MARC grant 5T34GM008078.

627

### 628 **Author contributions**

629 LPB, CMA, designed the study. LPB, BB, and ON performed the experiments. LPB and CMA wrote the  
630 manuscript.

631

### 632 **Ethics**

633 All animal procedures complied with the US National Institute of Health Guide for the Care and Use of  
634 Laboratory Animals and were approved by the New York University Animal Care Committees. All  
635 surgeries were performed under isoflurane anesthesia and every effort was made to minimize suffering.

636

### 637 **Competing interests**

638 The authors declare that no competing interests exist.

639

640

641 **References**

- 642 Adamsky, A., & Goshen, I. (2018, Feb 1). Astrocytes in Memory Function: Pioneering Findings and  
643 Future Directions. *Neuroscience*, *370*, 14-26. DOI:10.1016/j.neuroscience.2017.05.033
- 644  
645 Attwell, P. J. E., Cooke, S. F., & Yeo, C. H. (2002). Cerebellar Function in Consolidation of a Motor  
646 Memory. *Neuron*, *34*(6), 1011-1020. DOI:10.1016/s0896-6273(02)00719-5
- 647  
648 Bambah-Mukku, D., Travaglia, A., Chen, D. Y., Pollonini, G., & Alberini, C. M. (2014, Sep 10). A  
649 positive autoregulatory BDNF feedback loop via C/EBPbeta mediates hippocampal memory  
650 consolidation. *J Neurosci*, *34*(37), 12547-12559. DOI:10.1523/JNEUROSCI.0324-14.2014
- 651  
652 Baraban, M., Mensch, S., & Lyons, D. A. (2016, Jun 15). Adaptive myelination from fish to man. *Brain*  
653 *Res*, *1641*(Pt A), 149-161. DOI:10.1016/j.brainres.2015.10.026
- 654  
655 Bramham, C. R., Alme, M. N., Bittins, M., Kuipers, S. D., Nair, R. R., Pai, B., Panja, D., Schubert, M.,  
656 Soule, J., Tiron, A., & Wibrand, K. (2010, Jan). The Arc of synaptic memory. *Exp Brain Res*,  
657 *200*(2), 125-140. DOI:10.1007/s00221-009-1959-2
- 658  
659 Bujalka, H., Koenning, M., Jackson, S., Perreau, V. M., Pope, B., Hay, C. M., Mitew, S., Hill, A. F., Lu,  
660 Q. R., Wegner, M., Srinivasan, R., Svaren, J., Willingham, M., Barres, B. A., & Emery, B.  
661 (2013). MYRF is a membrane-associated transcription factor that autoproteolytically cleaves to  
662 directly activate myelin genes. *PLoS Biol*, *11*(8), e1001625. DOI:10.1371/journal.pbio.1001625
- 663  
664 Chen, D. Y., Stern, S. A., Garcia-Osta, A., Saunier-Rebori, B., Pollonini, G., Bambah-Mukku, D., Blitzer,  
665 R. D., & Alberini, C. M. (2011, Jan 27). A critical role for IGF-II in memory consolidation and  
666 enhancement. *Nature*, *469*(7331), 491-497. DOI:10.1038/nature09667
- 667  
668 Chen, M. B., Jiang, X., Quake, S. R., & Sudhof, T. C. (2020, Nov). Persistent transcriptional programmes  
669 are associated with remote memory. *Nature*, *587*(7834), 437-442. DOI:10.1038/s41586-020-  
670 2905-5
- 671  
672 Dudai, Y., Karni, A., & Born, J. (2015, Oct 7). The Consolidation and Transformation of Memory.  
673 *Neuron*, *88*(1), 20-32. DOI:10.1016/j.neuron.2015.09.004
- 674  
675 Einheber, S., Zanazzi, G., Ching, W., Scherer, S., Milner, T. A., Peles, E., & Salzer, J. L. (1997, Dec 15).  
676 The axonal membrane protein Caspr, a homologue of neurexin IV, is a component of the septate-  
677 like paranodal junctions that assemble during myelination. *J Cell Biol*, *139*(6), 1495-1506.  
678 DOI:10.1083/jcb.139.6.1495
- 679  
680 Emery, B. (2013, Oct). Playing the field: Sox10 recruits different partners to drive central and peripheral  
681 myelination. *PLoS Genet*, *9*(10), e1003918. DOI:10.1371/journal.pgen.1003918
- 682

- 683 Forbes, T. A., & Gallo, V. (2017, Sep). All Wrapped Up: Environmental Effects on Myelination. *Trends*  
684 *Neurosci*, 40(9), 572-587. DOI:10.1016/j.tins.2017.06.009
- 685  
686 Frankland, P. W., & Bontempi, B. (2005, Feb). The organization of recent and remote memories. *Nat Rev*  
687 *Neurosci*, 6(2), 119-130. DOI:10.1038/nrn1607
- 688  
689 Garcia-Osta, A., Tsokas, P., Pollonini, G., Landau, E. M., Blitzer, R., & Alberini, C. M. (2006, Jul 26).  
690 MuSK expressed in the brain mediates cholinergic responses, synaptic plasticity, and memory  
691 formation. *J Neurosci*, 26(30), 7919-7932. DOI:10.1523/JNEUROSCI.1674-06.2006
- 692  
693 Gerlai, R., Wojtowicz, J. M., Marks, A., & Roder, J. (1995, Jan-Feb). Overexpression of a calcium-  
694 binding protein, S100 beta, in astrocytes alters synaptic plasticity and impairs spatial learning in  
695 transgenic mice. *Learn Mem*, 2(1), 26-39. DOI:10.1101/lm.2.1.26
- 696  
697 Gibson, E. M., Purger, D., Mount, C. W., Goldstein, A. K., Lin, G. L., Wood, L. S., Inema, I., Miller, S.  
698 E., Bieri, G., Zuchero, J. B., Barres, B. A., Woo, P. J., Vogel, H., & Monje, M. (2014, May 2).  
699 Neuronal activity promotes oligodendrogenesis and adaptive myelination in the mammalian  
700 brain. *Science*, 344(6183), 1252304. DOI:10.1126/science.1252304
- 701  
702 Gold, P. E. (1986). The use of avoidance training in studies of modulation of memory storage. *Behavioral*  
703 *and Neural Biology*, 46(1), 87-98. DOI:10.1016/s0163-1047(86)90927-1
- 704  
705 Heyward, F. D., & Sweatt, J. D. (2015, Oct). DNA Methylation in Memory Formation: Emerging  
706 Insights. *Neuroscientist*, 21(5), 475-489. DOI:10.1177/1073858415579635
- 707  
708 Hughes, E. G., Orthmann-Murphy, J. L., Langseth, A. J., & Bergles, D. E. (2018, May). Myelin  
709 remodeling through experience-dependent oligodendrogenesis in the adult somatosensory cortex.  
710 *Nat Neurosci*, 21(5), 696-706. DOI:10.1038/s41593-018-0121-5
- 711  
712 Jendryka, M., Palchadhuri, M., Ursu, D., van der Veen, B., Liss, B., Katzel, D., Nissen, W., & Pekcec,  
713 A. (2019, Mar 14). Pharmacokinetic and pharmacodynamic actions of clozapine-N-oxide,  
714 clozapine, and compound 21 in DREADD-based chemogenetics in mice. *Sci Rep*, 9(1), 4522.  
715 DOI:10.1038/s41598-019-41088-2
- 716  
717 Kandel, E. R., Dudai, Y., & Mayford, M. R. (2014, Mar 27). The molecular and systems biology of  
718 memory. *Cell*, 157(1), 163-186. DOI:10.1016/j.cell.2014.03.001
- 719  
720 Katzman, A., Khodadadi-Jamayran, A., Kapeller-Libermann, D., Ye, X., Tsirigos, A., Heguy, A., &  
721 Alberini, C. M. (2021, Mar 24). Distinct Transcriptomic Profiles in the Dorsal Hippocampus and  
722 Prelimbic Cortex Are Transiently Regulated following Episodic Learning. *J Neurosci*, 41(12),  
723 2601-2614. DOI:10.1523/JNEUROSCI.1557-20.2021
- 724  
725 Krakauer, J. W., & Shadmehr, R. (2006, Jan). Consolidation of motor memory. *Trends Neurosci*, 29(1),  
726 58-64. DOI:10.1016/j.tins.2005.10.003

- 727  
728 Luo, M., Yin, Y., Li, D., Tang, W., Liu, Y., Pan, L., Yu, L., & Tan, B. (2021, Jan). Neuronal activity-  
729 dependent myelin repair promotes motor function recovery after contusion spinal cord injury.  
730 *Brain Res Bull*, 166, 73-81. DOI:10.1016/j.brainresbull.2020.11.009
- 731  
732 McKenzie, I. A., Ohayon, D., Li, H., de Faria, J. P., Emery, B., Tohyama, K., & Richardson, W. D.  
733 (2014, Oct 17). Motor skill learning requires active central myelination. *Science*, 346(6207), 318-  
734 322. DOI:10.1126/science.1254960
- 735  
736 Morita, J., Kano, K., Kato, K., Takita, H., Sakagami, H., Yamamoto, Y., Mihara, E., Ueda, H., Sato, T.,  
737 Tokuyama, H., Arai, H., Asou, H., Takagi, J., Ishitani, R., Nishimasu, H., Nureki, O., & Aoki, J.  
738 (2016, Feb 18). Structure and biological function of ENPP6, a choline-specific  
739 glycerophosphodiester-phosphodiesterase. *Sci Rep*, 6, 20995. DOI:10.1038/srep20995
- 740  
741 Morris, G. P., Clark, I. A., Zinn, R., & Vissel, B. (2013, Oct). Microglia: a new frontier for synaptic  
742 plasticity, learning and memory, and neurodegenerative disease research. *Neurobiol Learn Mem*,  
743 105, 40-53. DOI:10.1016/j.nlm.2013.07.002
- 744  
745 Mount, C. W., & Monje, M. (2017, Aug 16). Wrapped to Adapt: Experience-Dependent Myelination.  
746 *Neuron*, 95(4), 743-756. DOI:10.1016/j.neuron.2017.07.009
- 747  
748 Mumby, D. G., Gaskin, S., Glenn, M. J., Schramek, T. E., & Lehmann, H. (2002, Mar-Apr).  
749 Hippocampal damage and exploratory preferences in rats: memory for objects, places, and  
750 contexts. *Learn Mem*, 9(2), 49-57. DOI:10.1101/lm.41302
- 751  
752 Noori, R., Park, D., Griffiths, J. D., Bells, S., Frankland, P. W., Mabbott, D., & Lefebvre, J. (2020, Jun  
753 16). Activity-dependent myelination: A glial mechanism of oscillatory self-organization in large-  
754 scale brain networks. *Proc Natl Acad Sci U S A*, 117(24), 13227-13237.  
755 DOI:10.1073/pnas.1916646117
- 756  
757 Okuno, H., Akashi, K., Ishii, Y., Yagishita-Kyo, N., Suzuki, K., Nonaka, M., Kawashima, T., Fujii, H.,  
758 Takemoto-Kimura, S., Abe, M., Natsume, R., Chowdhury, S., Sakimura, K., Worley, P. F., &  
759 Bito, H. (2012, May 11). Inverse synaptic tagging of inactive synapses via dynamic interaction of  
760 Arc/Arg3.1 with CaMKIIbeta. *Cell*, 149(4), 886-898. DOI:10.1016/j.cell.2012.02.062
- 761  
762 Pajevic, S., Basser, P. J., & Fields, R. D. (2014, Sep 12). Role of myelin plasticity in oscillations and  
763 synchrony of neuronal activity. *Neuroscience*, 276, 135-147.  
764 DOI:10.1016/j.neuroscience.2013.11.007
- 765  
766 Pan, S., Mayoral, S. R., Choi, H. S., Chan, J. R., & Kheirbek, M. A. (2020, Apr). Preservation of a remote  
767 fear memory requires new myelin formation. *Nat Neurosci*, 23(4), 487-499.  
768 DOI:10.1038/s41593-019-0582-1
- 769

- 770 Pezze, M. A., Marshall, H. J., Domanikos, A., & Cassaday, H. J. (2016, Feb 4). Effects of dopamine D1  
771 modulation of the anterior cingulate cortex in a fear conditioning procedure. *Prog*  
772 *Neuropsychopharmacol Biol Psychiatry*, 65, 60-67. DOI:10.1016/j.pnpbp.2015.08.015
- 773  
774 Rivers, L. E., Young, K. M., Rizzi, M., Jamen, F., Psachoulia, K., Wade, A., Kessarlis, N., & Richardson,  
775 W. D. (2008, Dec). PDGFRA/NG2 glia generate myelinating oligodendrocytes and piriform  
776 projection neurons in adult mice. *Nat Neurosci*, 11(12), 1392-1401. DOI:10.1038/nn.2220
- 777  
778 Saunders, A., Macosko, E. Z., Wysoker, A., Goldman, M., Krienen, F. M., de Rivera, H., Bien, E., Baum,  
779 M., Bortolin, L., Wang, S., Goeva, A., Nemesh, J., Kamitaki, N., Brumbaugh, S., Kulp, D., &  
780 McCarroll, S. A. (2018, Aug 9). Molecular Diversity and Specializations among the Cells of the  
781 Adult Mouse Brain. *Cell*, 174(4), 1015-1030 e1016. DOI:10.1016/j.cell.2018.07.028
- 782  
783 Shepherd, J. D., & Bear, M. F. (2011, Mar). New views of Arc, a master regulator of synaptic plasticity.  
784 *Nat Neurosci*, 14(3), 279-284. DOI:10.1038/nn.2708
- 785  
786 Sherman, D. L., & Brophy, P. J. (2005, Sep). Mechanisms of axon ensheathment and myelin growth. *Nat*  
787 *Rev Neurosci*, 6(9), 683-690. DOI:10.1038/nrn1743
- 788  
789 Simons, M., & Nave, K. A. (2015, Jun 22). Oligodendrocytes: Myelination and Axonal Support. *Cold*  
790 *Spring Harb Perspect Biol*, 8(1), a020479. DOI:10.1101/cshperspect.a020479
- 791  
792 Squire, L. R., Genzel, L., Wixted, J. T., & Morris, R. G. (2015, Aug 3). Memory consolidation. *Cold*  
793 *Spring Harb Perspect Biol*, 7(8), a021766. DOI:10.1101/cshperspect.a021766
- 794  
795 Steadman, P. E., Xia, F., Ahmed, M., Mocle, A. J., Penning, A. R. A., Geraghty, A. C., Steenland, H. W.,  
796 Monje, M., Josselyn, S. A., & Frankland, P. W. (2020, Jan 8). Disruption of Oligodendrogenesis  
797 Impairs Memory Consolidation in Adult Mice. *Neuron*, 105(1), 150-164 e156.  
798 DOI:10.1016/j.neuron.2019.10.013
- 799  
800 Suzuki, A., Stern, S. A., Bozdagi, O., Huntley, G. W., Walker, R. H., Magistretti, P. J., & Alberini, C. M.  
801 (2011, Mar 4). Astrocyte-neuron lactate transport is required for long-term memory formation.  
802 *Cell*, 144(5), 810-823. DOI:10.1016/j.cell.2011.02.018
- 803  
804 Taubenfeld, S. M., Wiig, K. A., Monti, B., Dolan, B., Pollonini, G., & Alberini, C. M. (2001). Fornix-  
805 Dependent Induction of Hippocampal CCAAT Enhancer-Binding Protein  $\beta$  and  $\delta$  Co-Localizes  
806 with Phosphorylated cAMP Response Element-Binding Protein and Accompanies Long-Term  
807 Memory Consolidation. *The Journal of Neuroscience*, 21(1), 84-91. DOI:10.1523/jneurosci.21-  
808 01-00084.2001
- 809  
810 Tran, F. H., Spears, S. L., Ahn, K. J., Eisch, A. J., & Yun, S. (2020, Nov 20). Does chronic systemic  
811 injection of the DREADD agonists clozapine-N-oxide or Compound 21 change behavior relevant  
812 to locomotion, exploration, anxiety, and depression in male non-DREADD-expressing mice?  
813 *Neurosci Lett*, 739, 135432. DOI:10.1016/j.neulet.2020.135432

814  
815 Wang, F., Ren, S. Y., Chen, J. F., Liu, K., Li, R. X., Li, Z. F., Hu, B., Niu, J. Q., Xiao, L., Chan, J. R., &  
816 Mei, F. (2020, Apr). Myelin degeneration and diminished myelin renewal contribute to age-  
817 related deficits in memory. *Nat Neurosci*, 23(4), 481-486. DOI:10.1038/s41593-020-0588-8

818  
819 Weible, A. P., Rowland, D. C., Pang, R., & Kentros, C. (2009, Oct). Neural correlates of novel object and  
820 novel location recognition behavior in the mouse anterior cingulate cortex. *J Neurophysiol*,  
821 102(4), 2055-2068. DOI:10.1152/jn.00214.2009

822  
823 Xin, W., & Chan, J. R. (2020, Dec). Myelin plasticity: sculpting circuits in learning and memory. *Nat Rev*  
824 *Neurosci*, 21(12), 682-694. DOI:10.1038/s41583-020-00379-8

825  
826 Yirmiya, R., & Goshen, I. (2011, Feb). Immune modulation of learning, memory, neural plasticity and  
827 neurogenesis. *Brain Behav Immun*, 25(2), 181-213. DOI:10.1016/j.bbi.2010.10.015

828

## 829 **Figure Legends**

830

831 **Figure. 1 Learning rapidly induces oligodendrocyte-specific mRNAs and proteins.** (A) Schematic  
832 representation showing the experimental design: rats underwent IA training and were euthanized at 1 hour  
833 (1H), 1 day (1D), or 7 days (7D) after training and assessed with RT-qPCR. (B) RT-qPCR of *arc*  
834 performed in ACC extracts from untrained (UT) and trained rats euthanized at the timepoints indicated in  
835 A. (C) ACC and (D) dHC RT-qPCR analyses of the oligodendrocyte differentiation and myelin  
836 biogenesis genes *olig2*, *myrf*, *enpp6*, *mbp*, *mag* and *plp1*. Data are expressed as mean percentage  $\pm$  s.e.m.  
837 of the untrained group (UT). Unpaired (UP) controls were added in groups where significant upregulation  
838 of oligodendrocyte genes were found. N = 4-12 per group; one-way ANOVA followed by Dunnett's  
839 multiple comparison test; 2 independent experiments. (E-H) Examples and densitometric western blot  
840 analyses of MBP, MAG, CASPR, and OLIG2 obtained from ACC total extracts from trained rats  
841 euthanized at time points mentioned in A, compared to respective age-matched UT controls. UP controls  
842 were included at the one-day post training timepoint. Data presented as mean percentage  $\pm$  s.e.m. of  
843 untrained rats (n = 4-12 rats per group; two-tailed t-test; full Blot images can be found in Source Data file  
844 2). (I) Examples of immunofluorescent staining of OLIG2 in the ACC of rats euthanized 1D after IA  
845 compared to UT control. Cumulative distribution of OLIG2 intensity measured from nuclei of ACC from



846 UT and trained rats perfused 1 day (1D) after training (n = 1678 and 1410 cell across four rats in UT and  
847 1D groups respectively; two-tailed t-test;  $P < 0.001$ ). Mean values  $\pm$  s.e.m. of the total number of OLIG2+  
848 cells—data presented as positive cells per  $\text{mm}^2$ . Each dot represents the quantification of one image taken  
849 from the ACC. 4-6 images were taken per rat per side on a total of 4 rats [UT (n = 23) and Trained1D  
850 (n=20)]; two-tailed t-test; \* indicates  $p < 0.05$ , \*\* indicates  $p < 0.01$ \*\*\* indicates  $p < 0.001$ . For detailed  
851 statistical information, see Table 1-Source Data1.

852

853 **Figure 2. Learning increases oligodendrogenesis in the ACC but not the dHC.** Mice were injected  
854 with 5-ethynyl-2'-deoxyuridine (EdU), trained in IA, and perfused one day after training. (A)  
855 Representative immunohistochemical staining and relative quantifications for (upper panel) doubly  
856 stained EdU and Pdgfr $\alpha$  cells and (lower panel) and triple staining of EdU, Olig2 and CC1 to quantify  
857 OPC proliferation and differentiation, respectively. For each mouse, (A) ACC, (B) dHC, including CA1,  
858 CA2, CA3, and DG regions. Three coronal sections were quantified and averaged. In each coronal section  
859 the entire ACC and dHC were quantified bilaterally. Each dot in the graphs represents the average values  
860 of the three coronal section of each mouse. Data are presented as mean percentage  $\pm$  s.e.m. of positive cell  
861 number relative to Dapi+ nuclei (scale bars: 40  $\mu\text{m}$ ; n = 4 mice per group, two-tailed t-test; \*indicates  $P <$   
862 0.05). For detailed statistical information, see supplementary Table 2-Source Data1.

863

864 **Figure 3. Global knockout of myrf results in long-term memory impairment.** P-Myrf<sup>+/+</sup> (n = 3) and  
865 P-Myrf<sup>flox/flox</sup> (n = 5) littermates received one injection of tamoxifen (TAM) every other day for four  
866 times. Seven days after the last injection the mice underwent IA training. EdU was administered  
867 immediately before training and the mice were perfused one day after training. (A) Representative images  
868 and quantifications of ACC triple immunostaining (scale bar:40  $\mu\text{m}$ ) of EdU, Olig2 and CC1. For each  
869 mouse, three coronal sections were quantified and averaged. In each coronal section the entire ACC was  
870 quantified bilaterally. Each dot represents the average of the three coronal section of each mouse. Data are  
871 presented as mean percentage  $\pm$  s.e.m. of positive cell number relative to Dapi+ nuclei (scale bars: 40

872  $\mu\text{m}$ ; two-tailed t-test;). (B, C) P-Myrf<sup>+/+</sup> and P-Myrf<sup>flox/flox</sup> littermates were injected with TAM every  
873 other day for four injections terminating seven days before training. Mice were trained in IA and either  
874 tested at (B) 1, 7- and 28-days post-training ( $n = 10, 11$  per P-Myrf<sup>+/+</sup> and P-Myrf<sup>flox/flox</sup> per respectively)  
875 or (C) only at 28 days post-training ( $n = 13, 6$  per P-Myrf<sup>+/+</sup> and P-Myrf<sup>flox/flox</sup> groups respectively). (D) P-  
876 Myrf<sup>+/+</sup> ( $n = 9$ ) and P-Myrf<sup>flox/flox</sup> ( $n = 8$ ) littermates were trained and received tamoxifen injections  
877 starting 14 days after training and terminating seven days before testing, which occurred at 28D, 36D, and  
878 56D post-training. Data are represented as mean latency  $\pm$  s.e.m. (In seconds, s) (two-way ANOVA  
879 followed by Bonferroni *post hoc* test). (E) P-Myrf<sup>+/+</sup> ( $n = 12$ ) and P-Myrf<sup>flox/flox</sup> ( $n = 8$ ) littermates were  
880 injected four times with tamoxifen once every other day. Seven days after the last injection the mice  
881 underwent novel object location training and were tested 4 hours later (two-way ANOVA followed by  
882 Bonferroni *post hoc* test). (F) Open field test expressed as mean  $\pm$ s.e.m. of (i) percent time spent in the  
883 center of the arena, (ii) total distance, and (iii) mean velocity exploring the arena. ( $n = 9, 12$  mice per P-  
884 Myrf<sup>+/+</sup> and P-Myrf<sup>flox/flox</sup> groups respectively, two-tailed t-test; \* indicates  $p < 0.05$ , \*\* indicates  $p < 0.01$ ,  
885 \*\*\* indicates  $p < 0.001$ ). For detailed statistical information, see Table 3-Source Data1.

886

887 **Fig 4. Antisense-mediated MYRF knockdown in the ACC impairs memory consolidation.** (A) Rats  
888 were bilaterally injected in the ACC with either scrambled (SCR,  $n = 7$ ) or antisense oligonucleotides  
889 against Myrf (ASO,  $n = 6$ ) 15 minutes before training and euthanized one hour (1H) later for RT-qPCR  
890 analysis of myrf mRNA levels. (B) Immunohistochemistry representative images and quantification of  
891 MBP. Rats were bilaterally injected with either SCR ( $n = 6$ ) or AS ( $n = 4$ ) 15 minutes before and 6 hours  
892 after training and perfused one day after training for immunohistochemistry against MBP (scale bars: 160  
893  $\mu\text{m}$ ). (C, D, E) Mean latency of rats in which ACC (C, D) and dHC (E) were bilaterally injected with  
894 either scramble sequences or myrf antisense oligonucleotides. (C) Injections were given 15 minutes  
895 before training and rats were tested at one hour post-training ( $n = 6$  per group) or (D) injections were  
896 given 15 minutes before and 6 hours after training and rats were tested one day, and 28 days after training  
897 ( $n = 7$  per group). Rats received a reminder shock (RS) after the last testing, followed by another retention



898 test a day later (RS test). On day later the rats underwent re-training (RT), and memory retention was  
899 tested a day later (RT test). (E) Injections were given 15 minutes before and 6 hours after training and rats  
900 were tested one day and 28 days after training ( $n = 6$  per group). Data are presented as mean latency  $\pm$   
901 s.e.m. to enter the dark chamber (in seconds, s; two-way ANOVA followed by Bonferroni *post hoc* test; \*  
902 indicates  $P < 0.05$ , \*\* indicates  $P < 0.01$ , \*\*\* indicates  $P < 0.001$ ). For detailed statistical information, see  
903 table 4-source data1.

904

905 **Fig 5. Myrf knockout in the mouse ACC impairs memory formation.** (A) Experimental design: AAV-  
906 MBP-CreER<sup>T2</sup> was injected bilaterally into the ACC of Myrf<sup>+/+</sup> ( $n = 3$ ) and Myrf<sup>flox/flox</sup> mice ( $n = 5$ ).  
907 Fourteen days following viral injection, mice were injected intraperitoneally (i.p.) with tamoxifen (TAM)  
908 every other day for 4 times, terminating seven days before the training. Mice were then injected i.p. with  
909 EdU, immediately after IA training and perfused for immunohistochemistry one day after training. (B)  
910 Diffusion of injection shown by Chicago sky blue diffusion targeted mainly the ACC (right panel). Left  
911 panel image adapted from mouse brain atlas (scale bar: 200  $\mu\text{m}$ ). (C) Representative  
912 immunohistochemical staining (scale bar: 40  $\mu\text{m}$ ) and quantification of ACC triple immunostaining of  
913 EdU, Olig2 and CC1. For each mouse, three coronal sections were quantified and averaged. In each  
914 coronal section the entire ACC was quantified bilaterally. Each dot represents the average of the three  
915 coronal sections of each mouse. Data are presented as mean percentage  $\pm$  s.e.m. of positive cell number  
916 relative to Dapi+ nuclei in the ACC (two-tailed t-test). (D, E, F) mean latency to enter the dark chamber  
917 (in seconds, s). (D) AAV-MBP-CreERT2 was injected bilaterally into the ACC of Myrf<sup>+/+</sup>, and Myrf<sup>flox/flox</sup>  
918 mice. Fourteen days following viral injection, mice were received 4 injections of (TAM) (once every  
919 other day) and seven days later they underwent IA training and were tested at one hour (1H) after training  
920 to test short-term memory ( $n = 7$  per group). (E) The mice underwent the same protocol described in D  
921 but were tested at one day (1D) and seven days (7D) after training to assess for long-term memory ( $n =$   
922 7,11 per Myrf<sup>+/+</sup>, and Myrf<sup>flox/flox</sup> groups respectively). Data are represented as mean latency  $\pm$  s.e.m. two-  
923 way ANOVA followed by Bonferroni *post hoc* test. (F) AAV-MBP-CreER<sup>T2</sup> was injected bilaterally into

924 the dHC of  $Myrf^{+/+}$  ( $n = 6$ ) and  $Myrf^{flox/flox}$  mice ( $n = 7$ ). Fourteen days following viral injection, the mice  
925 received the 4 times TAM protocol and 7 days later were trained in IA. They were then tested at 1D and  
926 7D after training. Data are represented as mean latency  $\pm$ s.e.m. (in seconds, s; two-way ANOVA followed  
927 by Bonferroni *post hoc* test, \* Indicates  $p < 0.05$ , \*\*\* indicates  $p < 0.001$ ). For detailed statistical  
928 information, see table 5-source data1.

929

930 **Fig 6. Neuronal activity inhibition during learning impairs learning-induced oligodendrogenesis**  
931 **and long-term memory formation.** (A) ACC targeting of viral injections. Upper panel: AAV-hSyn-  
932 hM4D(Gi)-mCherry was injected stereotactically targeting the ACC of mice; the infection targeted  
933 largely the ACC as shown by the mCherry expression. Lower panel; image adapted from mouse brain  
934 atlas (scale bar: 200  $\mu$ m). (B) Experimental and mean latency of mice injected with either C21 or Vehicle  
935 ( $n = 7$  per group) fourteen days following viral injection, at one hour before training. The mice were  
936 tested one day (1D) following training. Data are represented as mean latency  $\pm$  s.e.m. to enter the dark  
937 chamber (in seconds, s; two-tailed t-test; \* Indicates  $p < 0.05$ ). (C) ACC oligodendrogenesis assessed by  
938 double staining of EdU and Olig2 in mice injected with AAV-hSyn-hM4D(Gi)-mCherry and two weeks  
939 later injected i.p. with Veh or C21 one hour before training. Left: high magnification representative image  
940 (scale bar: 40  $\mu$ m) and Right: quantification of ACC double staining. For each mouse, three coronal  
941 sections were quantified and averaged. In each coronal section the entire ACC was quantified bilaterally.  
942 Each dot represents the average of the three coronal sections of each mouse. Data are presented as mean  
943 percentage  $\pm$  s.e.m. number of double positive cells relative to Dapi+ nuclei in the ACC ( $n = 3$  mice per  
944 group, two-tailed t-test; \* Indicates  $p < 0.05$ ). For detailed statistical information, see table 6-source data1.

945

946 **Supplementary data Figure 1.** (A) quantifications of EdU, Olig2 and CC1 triple staining in the dHC  
947 subregions CA1, CA2, CA3, and DG. Three coronal sections were quantified and averaged. In each  
948 coronal section the entire CA1, CA2, CA3, or DG were quantified bilaterally. Each dot in the graphs  
949 represents the average values of the three coronal section of each mouse. Data are presented as mean

950 percentage  $\pm$  s.e.m. of positive cell number relative to Dapi+ nuclei (n = 4 mice per group, two-tailed t-  
951 test). For detailed statistical information, see table 2-source data1.

952

953

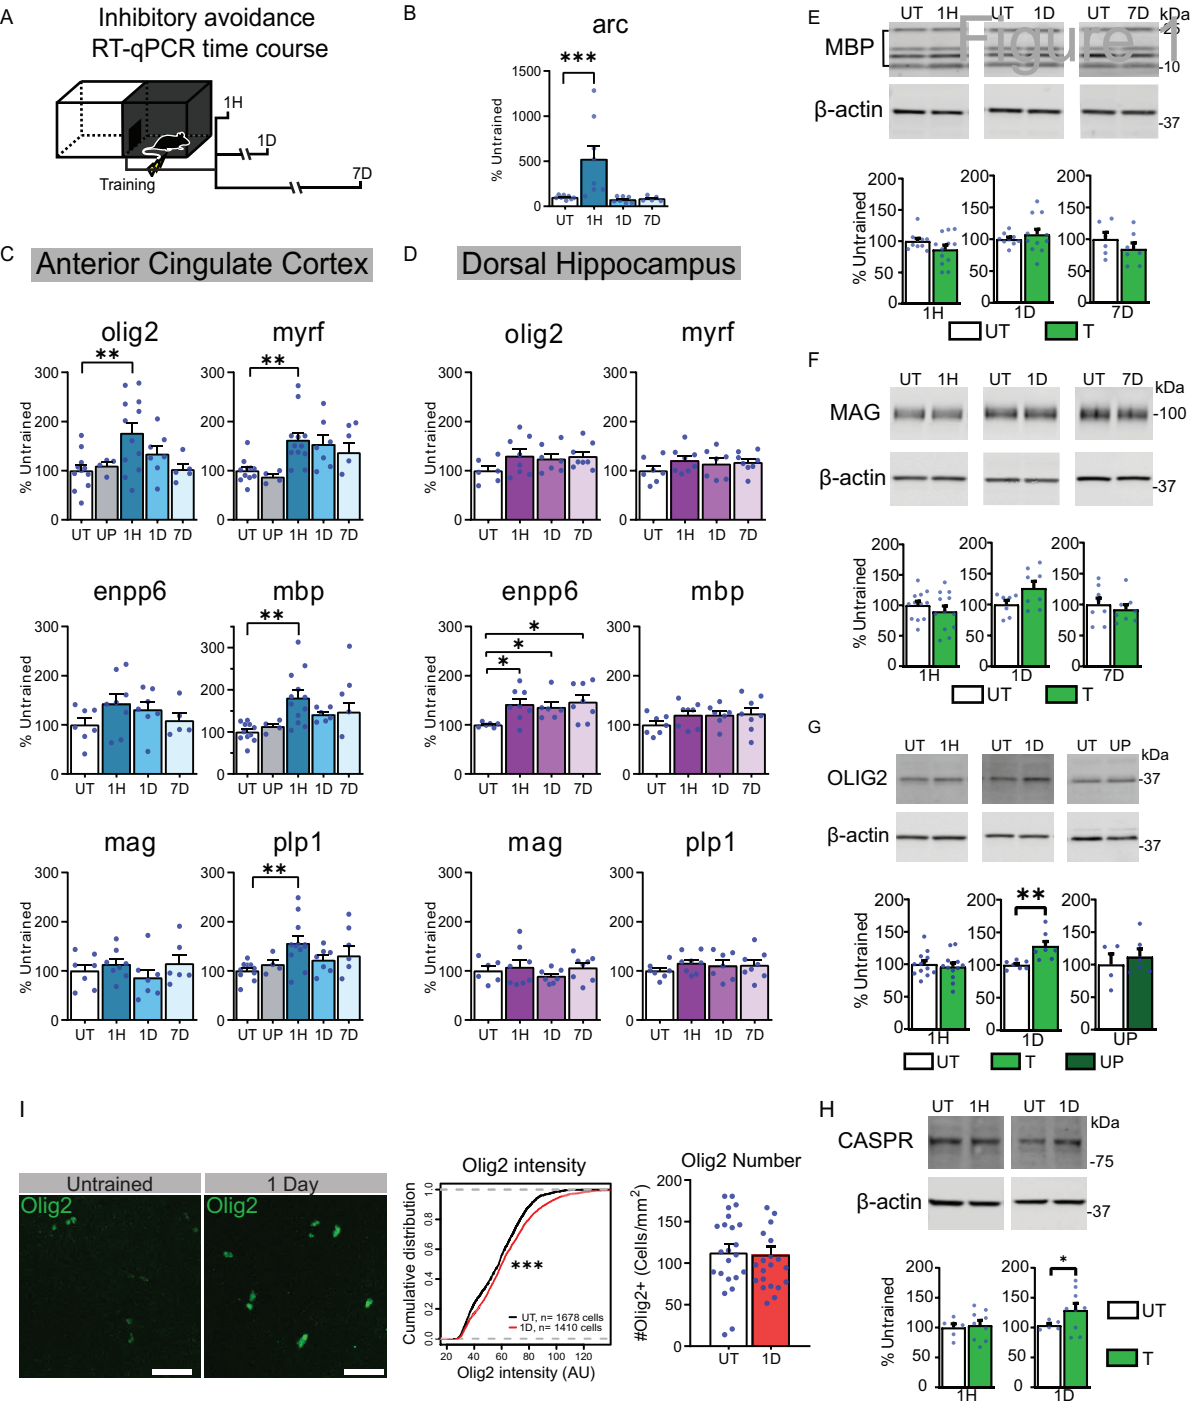

A

## ACC

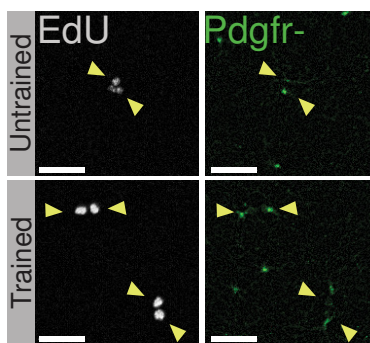

## Proliferation

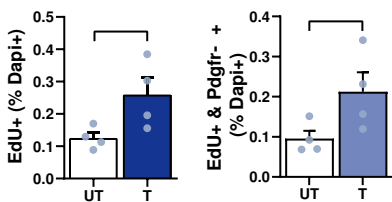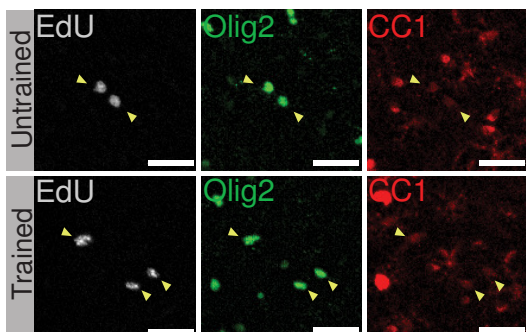

## Differentiation

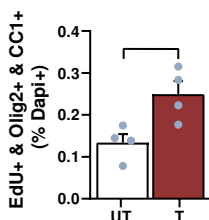

B

## Dorsal Hippocampus

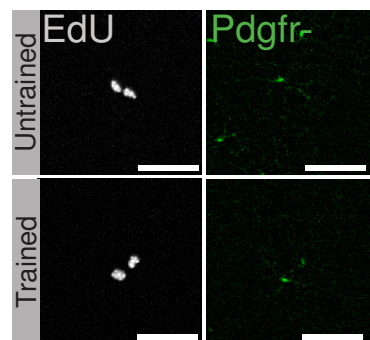

## Proliferation

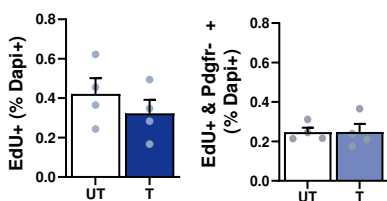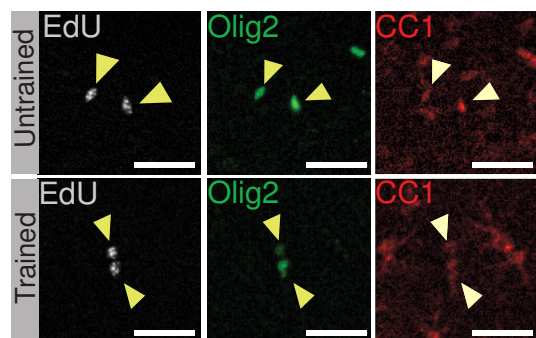

## Differentiation

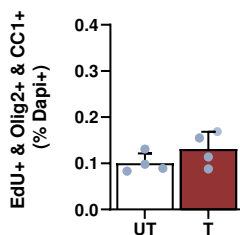

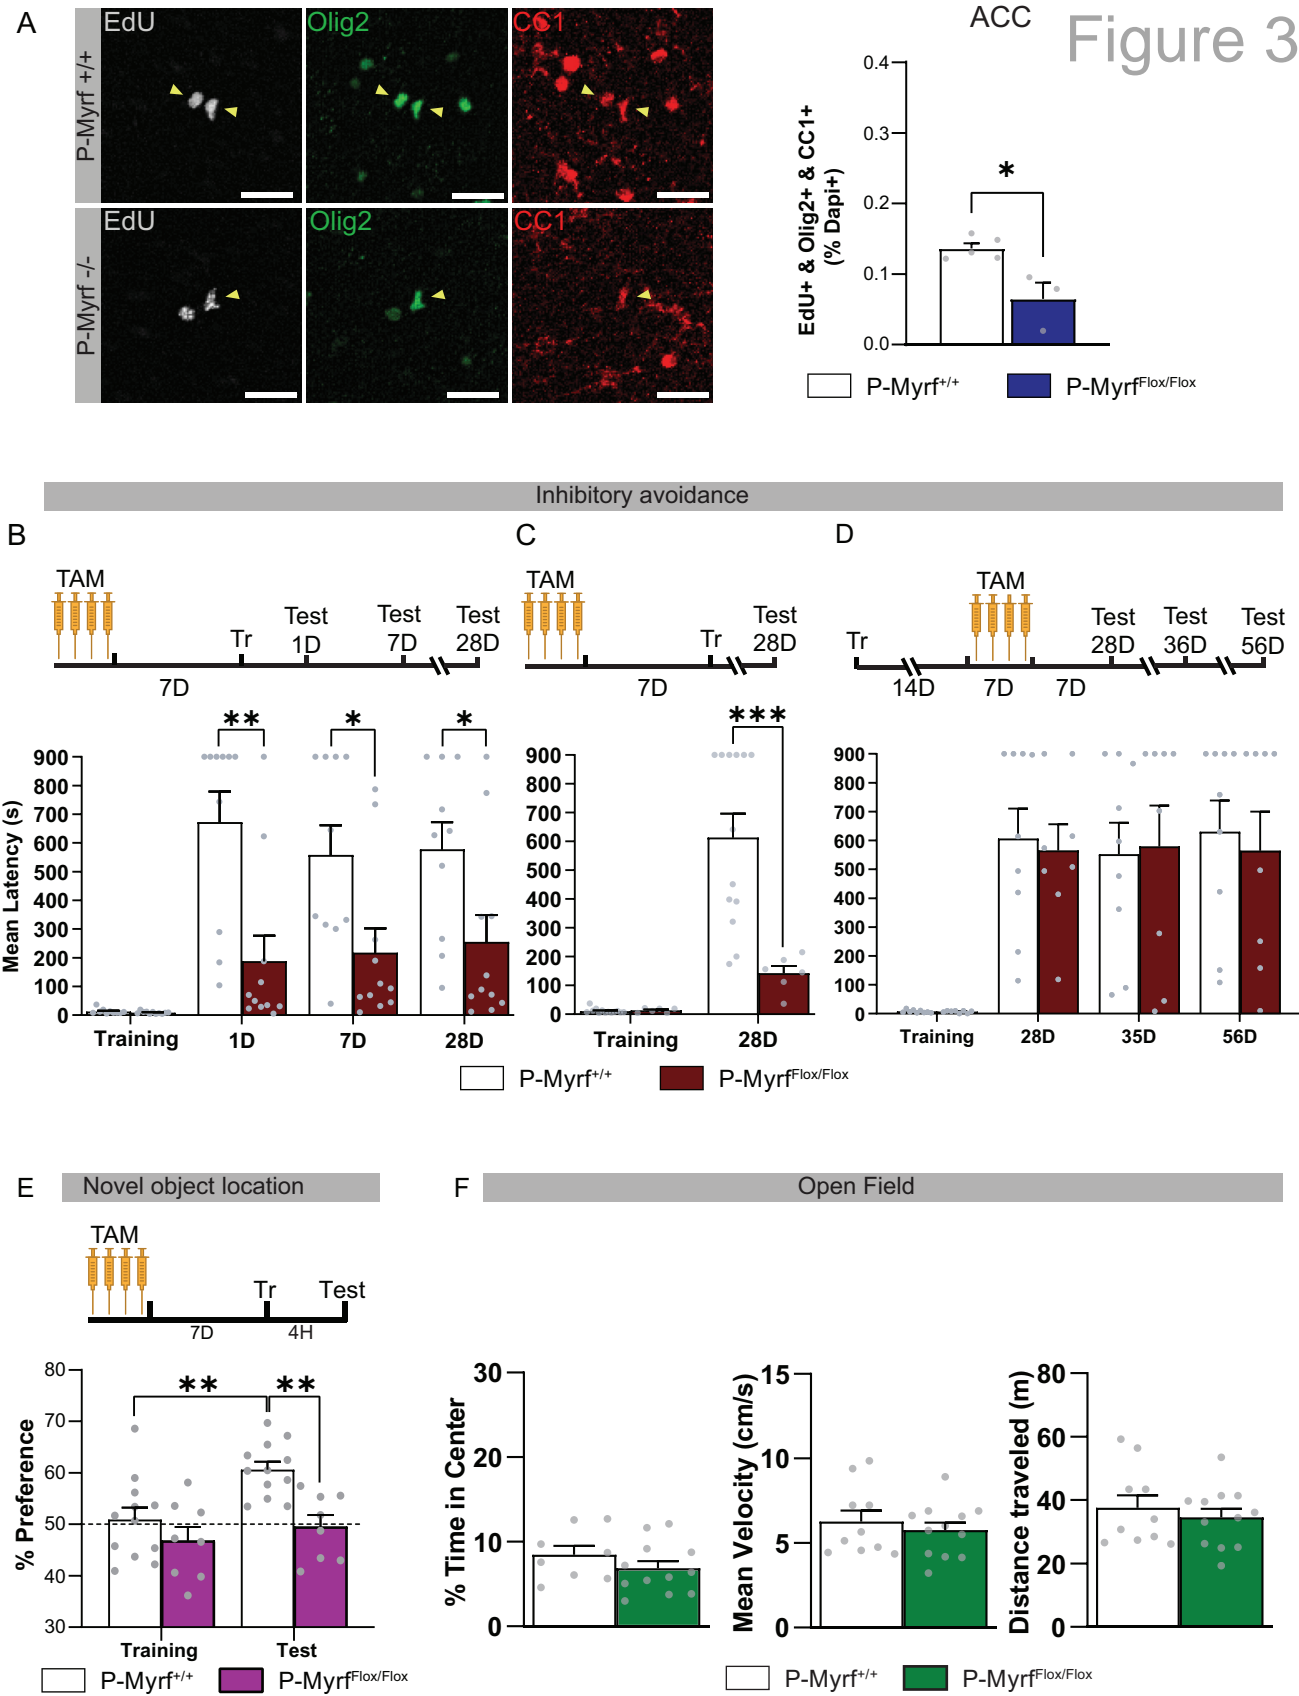

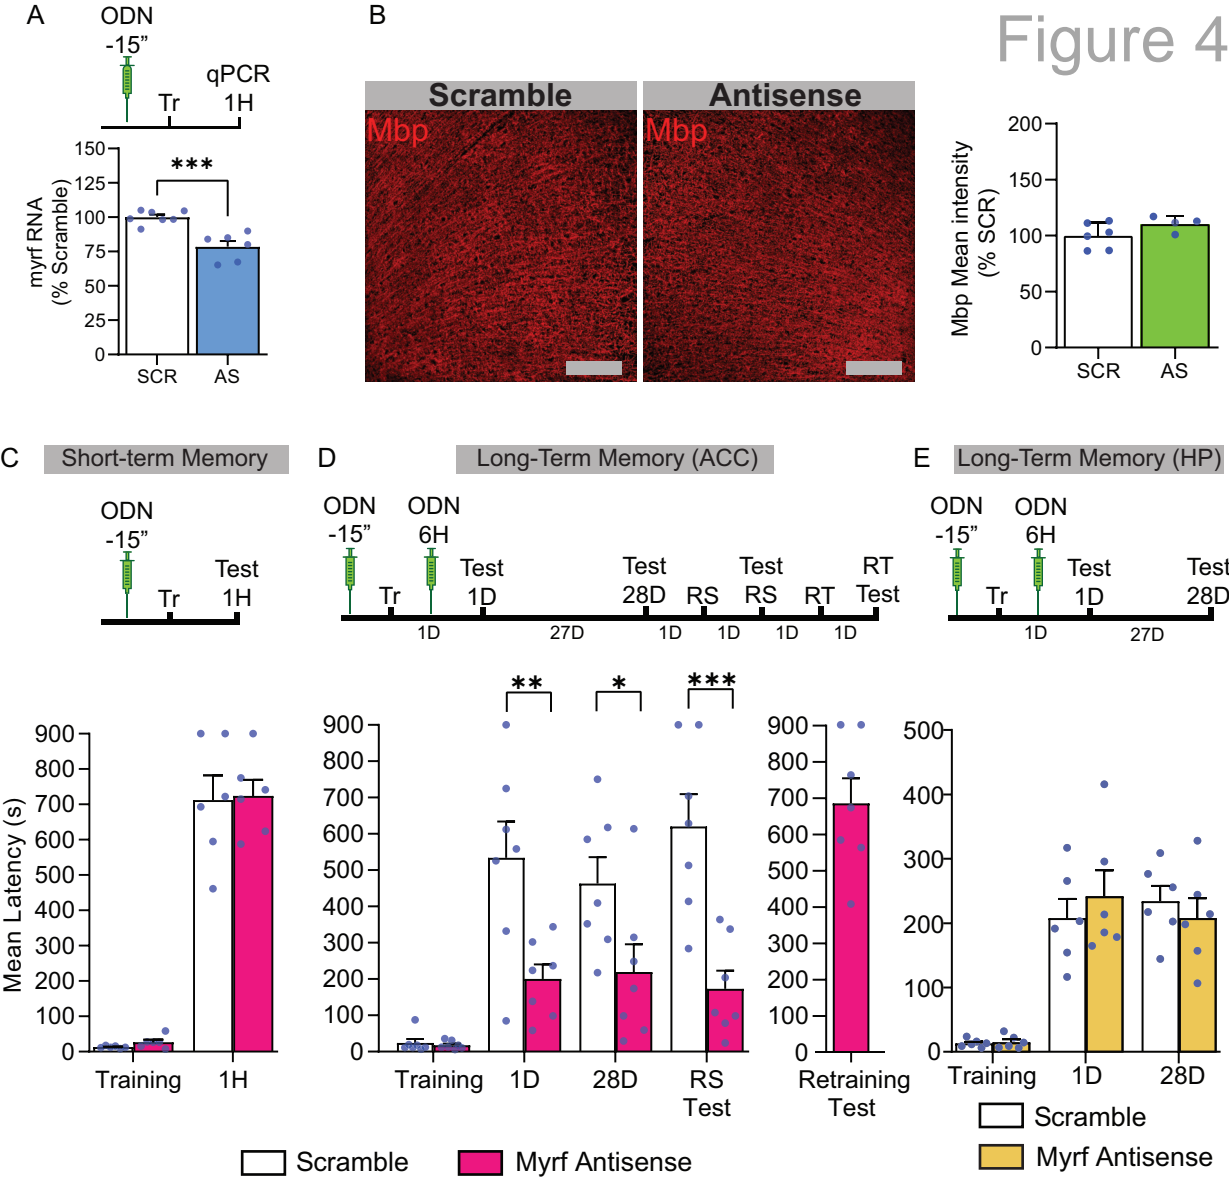



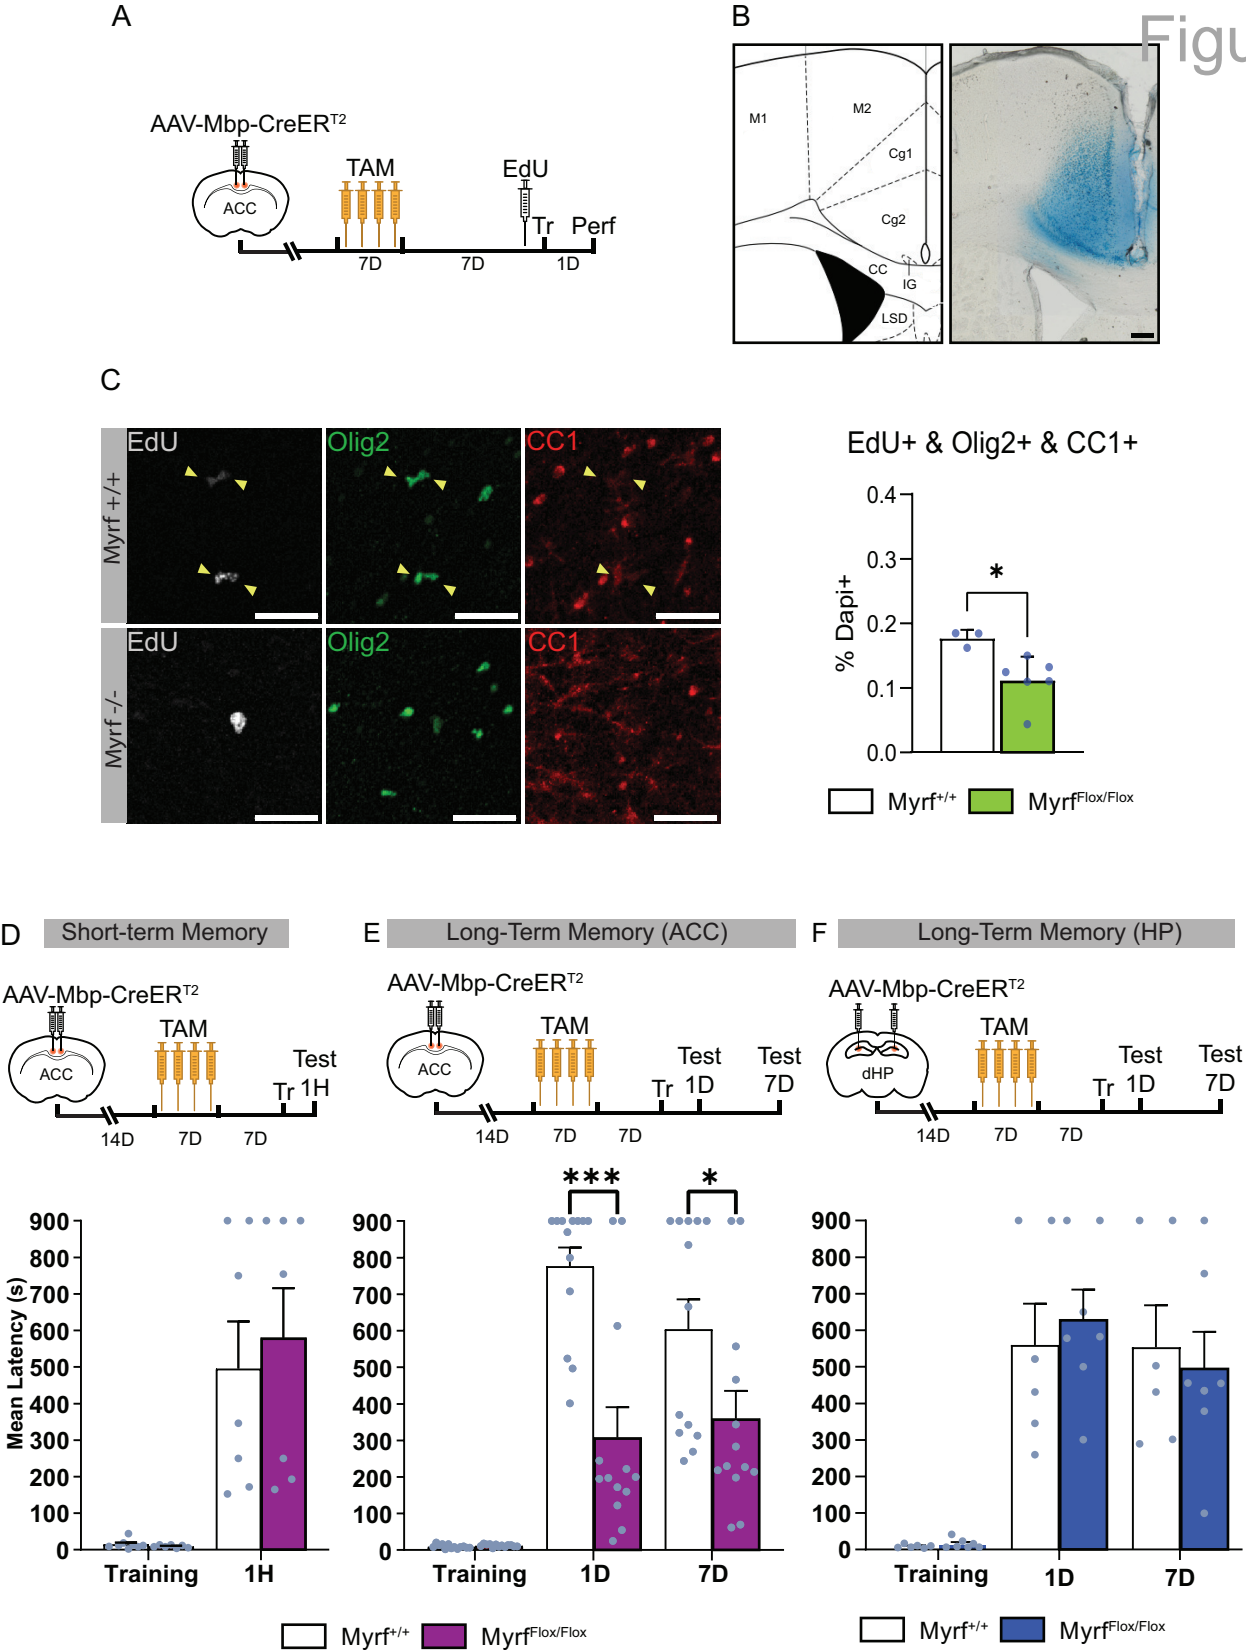



A

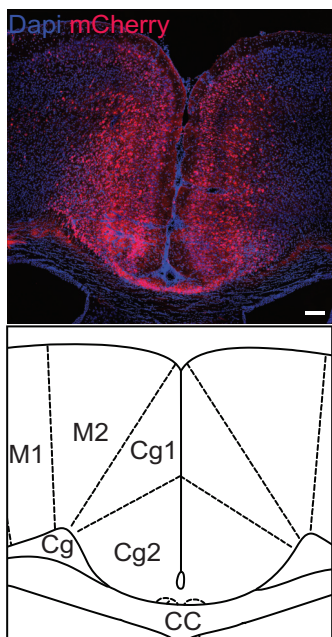

B

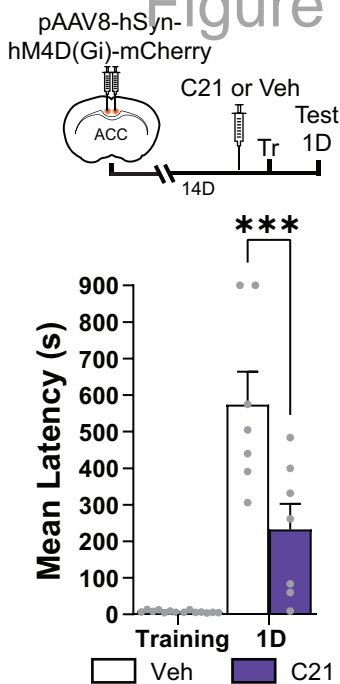

C

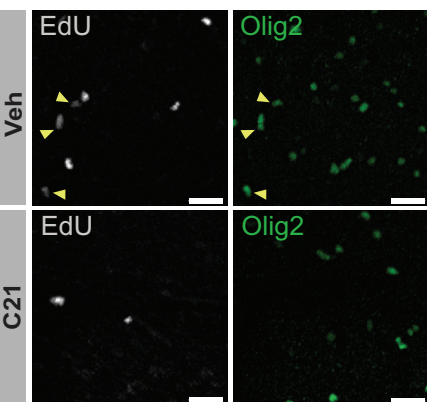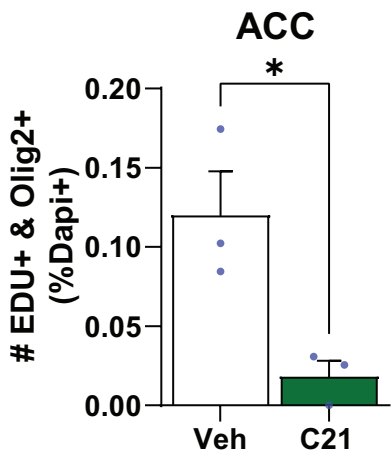

A

## Differentiation

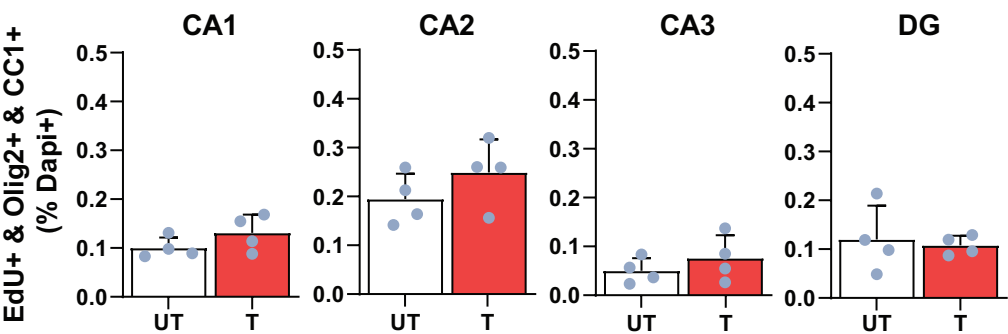

Source: https://www.biorxiv.org/content/10.1101/2021.12.10.472135v1.full.pdf
